1 **Integrated transcriptome, DNA methylome and chromatin state accessibility**  
2 **landscapes reveal regulators of Atlantic salmon maturation**

3

4 Amin R. Mohamed <sup>1,2</sup>, Marina Naval-Sanchez<sup>1</sup>, Moira Menzies<sup>1</sup>, Bradley Evans<sup>3</sup>,

5 Harry King<sup>4</sup>, Antonio Reverter<sup>1</sup>, James W. Kijas <sup>1\*</sup>

6

7 **Affiliations**

8 <sup>1</sup> CSIRO Agriculture and Food, Queensland Bioscience Precinct, St Lucia, Brisbane,  
9 Queensland 4067, Australia

10 <sup>2</sup> Zoology Department, Faculty of Science, Benha University, Benha 13518, Egypt

11 <sup>3</sup> Tassal Operations Pty Ltd, Hobart, Tasmania 7001, Australia

12 <sup>4</sup> CSIRO Agriculture and Food, Hobart, Tasmania 7004, Australia

13

14 \* For correspondence: [James.Kijas@csiro.au](mailto:James.Kijas@csiro.au)

15

16 Running title: Multiomics profiling during onset of salmon maturation

17

18

19

20

21

22

23

24

25 **Abstract**

26

27 Despite sexual development being ubiquitous to vertebrates, the epigenetic  
28 mechanisms controlling this fundamental transition remain largely undocumented in  
29 many organisms. Through whole-methylome, whole-transcriptome and chromatin  
30 landscape sequencing, we discovered global control mechanisms as well as specific  
31 regulators of sexual maturation in Atlantic salmon. This large integrated study was  
32 based on an experimental time course that successfully sampled the period when  
33 Atlantic salmon commence their trajectory towards sexual maturation. Co-analysis of  
34 DNA methylome and gene expression changes revealed chromatin remodelling  
35 genes *arid1b* and *smarca2* were both significantly hypermethylated and upregulated  
36 in the ovary during the onset of maturation. We also observed changes in chromatin  
37 state landscape occurred early in the transition and were strongly correlated with  
38 fundamental remodelling of gene expression. Finally, we integrated our multiomics  
39 datasets to identify *trim25* and *znf423* as key regulators in the pituitary that  
40 underwent 60 fold change in connectivity during the transition to sexual maturation.  
41 The study provides a comprehensive view of the spatiotemporal changes involved in  
42 a complex trait and opens the door to future efforts aiming to manipulate puberty in  
43 an economically important aquaculture species.

44

45

46

47

48

49

50 **Main**

51

52 Epigenetic regulation of gene expression influences a vast spectrum of complex  
53 traits, with examples spanning the onset and severity of human disease,  
54 developmental transitions during growth and the expression of ecologically and  
55 economically relevant traits across the animal kingdom. Our understanding of the  
56 epigenetic contributions to trait variation remains low in comparison to causative  
57 genes derived from approaches such as genome wide association studies. However,  
58 the relatively recent development of sophisticated sequence-based assays for the  
59 detection of chromatin state changes and methylation status have enabled the  
60 landmark development of genome wide maps of regulatory elements in human <sup>1,2,3</sup>,  
61 mouse <sup>4,5,6</sup> and other model organisms such as the fruit fly (*Drosophila*  
62 *melanogaster*) and the nematode (*Caenorhabditis elegans*) <sup>7,8</sup>. These have provided  
63 the impetus for a plethora of research focussed on understanding epigenetic  
64 mechanisms and their role regulating gene expression.

65

66 Sexual maturation is a fundamental transition ubiquitous to vertebrates and provides  
67 a model for the study of epigenetic regulation. The key tissues are known given the  
68 reproductive cycle is regulated by activation across the brain, pituitary, gonadal  
69 (BPG) axis in organisms spanning mammals to teleost fish. Further, upon maturation  
70 these tissues undergo known and often profound transcriptomic remodelling  
71 providing a large dynamic range to increase the likelihood of identifying regulatory  
72 networks <sup>9,10,11,12</sup>. The genetic architecture of sexual maturation has been  
73 extensively studied using association studies in both wild and farmed Atlantic salmon  
74 populations <sup>13,14,15,16</sup>. Despite the importance of sexual maturation as a trait of

75 interest it can be difficult to study, as the timing of onset varies widely in response to  
76 both genetics and environmental factors and occurs prior to measurable phenotypic  
77 change. To overcome this, we chose to investigate sexual maturation in Atlantic  
78 salmon where photoperiod manipulation in an experimental system can be used to  
79 synchronise animals and access tissues across the time period when animals first  
80 commit to the onset of puberty. We also chose a multiomics approach, which has the  
81 power to identify the control mechanisms underpinning complex traits<sup>17,18</sup>. We  
82 describe changes in gene expression, DNA methylation and chromatin accessibility  
83 to identify epigenetic mechanisms associated with maturation in a commercially  
84 important aquaculture species.

85

86

## 87 **Results**

88

### 89 **Initiation of Atlantic salmon sexual maturation and a multiomic workflow**

90 Fish were managed in a tank based experimental system to facilitate a long-light  
91 photoperiod regime known to stimulate the onset of sexual maturation (Fig. 1a)<sup>19,20</sup>.  
92 Fish from a single management group were sacrificed at a timepoint immediately  
93 before initiation of the long-light regime (throughout referred to as T1) and at three  
94 timepoints afterwards (T2, T3 and T4). An increase in gonadal somatic index (GSI)  
95 of sampled fish across the time course confirmed an active response to the long  
96 photoperiod (Fig. 1b). Significant increases were observed only at T4 (t-test P-value  
97 = 0.021). Tissues from the brain – pituitary – gonad axis and liver were sampled at  
98 each timepoint to form the basis of a multiomics workflow for data generation and

99 integrative analysis spanning the transcriptome, DNA methylome and chromatin  
100 state datatypes (Fig. 1c; Supplementary Fig. S1).

101

## 102 **Maturation leads to significant transcriptome changes**

103 We sequenced messenger RNA (mRNA) from four biological replicates of each  
104 tissue before and after the onset of maturation. A total of 3.2 billion paired-end reads  
105 were mapped against the Atlantic salmon reference genome with 72% mapping  
106 efficiency to create an average depth of 50 million reads per library (Supplementary  
107 Table 1). Consistency across biological replicates within each timepoint was high for  
108 each tissue except for brain (see Supplementary Results; Supplementary Fig. S2).

109 To begin characterization of transcriptomic remodelling, we compared gene  
110 expression levels in three post-maturation samples (T2, T3 and T4) to the control T1  
111 (Fig. 2a). The pituitary gland showed comparatively few transcriptomic responses  
112 that involved 543 differential expressed genes (DEGs) (Supplementary Table S2). In  
113 contrast, more widespread remodelling was observed in both ovary (5,993 DEGs)  
114 and liver (9,541 DEGs, adjusted  $P < 0.05$  (Fig. 2a, Supplementary Tables S3, S4).  
115 The number of DEGs increased with elapsed time following the onset of the long  
116 light photoperiod for the two BPG axis tissues (pituitary and ovary). Of these, the  
117 ovary underwent the most dramatic remodelling over time with 403, 1,709 and then  
118 3,497 DEGs observed at timepoints T2, T3 and T4 respectively. This increasing  
119 trajectory of differential gene expression, coupled with the elevated GSI following the  
120 light stimuli (Fig. 1b), strongly suggests the experimental approach successfully  
121 initiated the onset of maturation.

122

123

## 124 **Upregulation of pituitary hormones**

125 The pituitary is expected to play a key role in the early triggers for maturation onset  
126 (21). Hierarchical clustering of the pituitary DEGs revealed two distinct groups, one  
127 of upregulated genes (n=333; 60% of pituitary DEGs) and one of downregulated  
128 genes (n=125). The upregulated group showed significant Gene Ontology (GO)  
129 enrichment for maturation-related functions including *G protein-coupled receptor*  
130 *signalling* and *hormone activity* (Supplementary Fig. S4 and Supplementary Table  
131 S5). Pituitary DEGs were involved in several reproduction-related functions such as  
132 steroidogenesis (*cyp17a1*), hormone receptors (*oxtr*, *pgr*, *dop1r1*, *galr1*), genes  
133 coding for pituitary hormones (*gh2*, *gthb1*, *gthb2*, *glha2*), retinoic acid (RA) signalling  
134 (*cyp26b1*, *rhd8-1/2*) and sex-related transcription factors (TFs) (several *sox* genes  
135 and *gata2*). The upregulation of gonadotropins subunits is highly significant (Fig. 2b).  
136 This included both *gthb1* and *gthb2* that encode the gonadotropin subunits beta-1  
137 and 2 as well as *glha2* that encodes the glycoprotein hormone alpha chain.  
138 Together, these form the heterodimeric gonadotropins *gth-1* and *gth-2* that have  
139 previously been shown to stimulate gonadal growth in the juvenile stages of both  
140 rainbow trout and coho/chum salmon <sup>22,23,24</sup>. Further, physicochemical  
141 characterization of the salmon gonadotropins indicate they are functionally related to  
142 follicle stimulating hormone (fsh) and luteinizing hormone (lh) in vertebrates  
143 (reviewed by <sup>25</sup>). We find *glha2* (the common subunit present in gonadotropins)  
144 was consistently upregulated in the pituitary throughout the experiment  
145 (Supplementary Fig. S3). Our results directly confirm the action of these key  
146 pituitary hormones in the onset of maturation. To characterize the transcriptomic  
147 remodelling occurring in the ovary and liver, we assessed the DEG sets for GO  
148 enrichment. Upregulated genes in the ovary revealed processes related to *cell*

149 *adhesion, immune/inflammatory response and development* (Supplementary Fig.  
150 S5; Supplementary Table S6), while gene families involved in *organic acid metabolic*  
151 *processes* and *mitochondrial transport* were enriched among liver upregulated genes  
152 (Supplementary Fig. S7 and Supplementary Table 7). Maturation-related functions  
153 including steroidogenesis, hormonal receptors and follicular development were  
154 identified in ovary (see Supplementary Results; Supplementary Fig. S6).

155

### 156 **DNA methylome maps of three Atlantic salmon tissues**

157 To investigate the regulatory mechanisms controlling differential expression, the first  
158 genome-wide CpG methylation maps were developed for Atlantic salmon using  
159 whole-genome bisulfite sequencing (WGBS). Methylome data was collected from  
160 two biological replicates at the terminal time points (T1 and T4, Fig. 1c) from three  
161 tissues (pituitary, ovary and liver), generating 2.6 billion paired-end uniquely mapped  
162 reads (average coverage of 11x) (Supplementary Table S8). We found a genome-  
163 wide methylation rate of 81% per sample (Supplementary Fig. S8; Supplementary  
164 Table S8), which is similar to the rate observed in vertebrate genomes (60-90%)  
165 <sup>26,27</sup>. Methylome data was assessed based on coverage, read mapping and  
166 consistency between biological replicates (see Supplementary Results;  
167 Supplementary Table S8; Supplementary Fig. S8c, d). Among the different  
168 dinucleotide contexts, CpG methylation contributed the vast majority (~ 99.5% on  
169 average) compared to CHH or CHG methylation which were excluded from further  
170 analysis (Supplementary Fig. S8a; Supplementary Table S8).

171

172 By comparing the CpG methylation patterns between T4 and T1 samples (Fig. 3a),  
173 we identified 1902, 2982 and 1606 differentially methylated regions (DMRs) in the

174 pituitary gland, ovary and liver respectively (Fig. 3b; Supplementary Fig. 9a, b;  
175 Supplementary Tables 9, 10, 11). The average length of DMRs was short (251 bp)  
176 and their distribution was both genome wide (Fig. 3b) and highly non-random, with  
177 52% found to overlap protein coding genes and another 18% located within 5 kb  
178 upstream or downstream (Fig. 3c; Supplementary Fig. 9c). The location of DMRs  
179 was also strongly tissue specific, with few regions shared between tissue pairs and  
180 only 8 found in all three tissues (Supplementary Fig. 9b). Next, we investigated the  
181 directionality of DMRs across tissues and found approximately equal rates of hyper-  
182 methylation (increased methylation in T4) and hypo-methylation (decreased  
183 methylation in T4) in both the pituitary and liver. Strikingly, the majority of DMRs in  
184 ovary were hyper-methylated (2175 DMRs or 73%), independent of their genomic  
185 location (genic regions, promoters, 5 kb downstream or intergenic) (Supplementary  
186 Fig. 9d). This is consistent with DNA methylation having important roles during  
187 epigenomic reprogramming in embryo and stem cells development<sup>28</sup>, compared to  
188 highly stable methylomes in somatic cells<sup>29</sup>. This pronounced skew towards  
189 increased methylation occurred in the tissue with both the highest total number of  
190 observed DMRs and the largest increase in upregulation of gene expression. Of the  
191 tissues investigated, the ovary also undergoes the most radical physiological change  
192 during maturation as it transforms via vitellogenesis and oocyte development in  
193 preparation for egg release during spawning.

194

### 195 **Differentially methylated genes serve key roles in maturation**

196 The gene catalogue present within differentially methylated regions (DMRs) was  
197 assessed for their function in relation to the trait. The majority of differentially  
198 methylated genes (DMGs) in ovary were hypermethylated (n=1165; 74%)



199 (Supplementary Fig. S9d) and significantly enriched for three biological process  
200 (GO-BP), one cellular component (GO-CC) and 24 molecular function (GO-MF)  
201 terms including those with maturation-related functions such as  
202 *semaphorin/glutamate receptor activity* (Supplementary Fig. S10; Supplementary  
203 Table S12). Among these genes, at least 33 genes have demonstrated roles in the  
204 biology of maturation including follicular development (*plexnb1*, *sema4f* coding for  
205 Plexin-B1 and Semaphorin-4f)<sup>30</sup> and the control of gonadotropin-releasing hormone  
206 excitability (*grm8* coding for the glutamate receptor 8)<sup>31</sup>. We plotted the normalised  
207 expression of these candidates from samples collected at T1 and T4 and found that  
208 the majority were upregulated at T4, consistent with their hyper-methylated status  
209 (Supplementary Fig. S11).

210

### 211 **Co-analysis of DNA methylome and transcriptome reveals role for chromatin** 212 **remodelling during maturation**

213 The identification of significant transcriptional and methylation changes allowed us to  
214 explore the dynamic between these two processes by assessing the overlap of  
215 genes declared as both DEG and DMG. The overlap was low and non-significant for  
216 liver (38 / 616 or 6% of DMGs were also DEGs) and pituitary (11 / 762 or 1.4% of  
217 DMGs were DEGs) (Supplementary Fig. S9e). However, 195 or 14% of ovary DMGs  
218 (195 / 1357) were also differentially expressed, a number that exceeded random  
219 expectation in 83.8% of 1000 permutations tests (Fig. 3d). This suggests changes in  
220 methylation status may directly control gene expression in this subset of genes. If  
221 true, we would expect to see correspondence between the directionality of the  
222 expression and methylation changes. This appeared to be the case, as 82% of  
223 upregulated genes (148 / 179; Binomial P-value = 8.727E-20) were hyper-

224 methylated at T4 relative to T1 (Fig. 3e), matching the classical expectation of gene  
225 body methylation mediated control of gene expression<sup>32,33</sup>. The 148 genes were  
226 enriched for 3 GO-CC terms related to chromatin remodelling complexes (SWI/SNF  
227 and nBAF) (Fig. 3f; Supplementary Table S13), and the associated genes displaying  
228 coordinated expression and methylation status (Fig. 3g). For example, the *arid1b*  
229 gene encodes AT-rich interactive domain-containing protein 1B and *smarca2*  
230 encodes the global transcription activator snf2l2. Both proteins are involved in  
231 chromatin remodelling as they are core components of the SWI/SNF remodelling  
232 complexes<sup>34</sup> that carry out enzymatic change to chromatin structure by altering DNA-  
233 histone contacts<sup>35</sup>. This opens the possibility they act as key control points, to  
234 regulate a wide array of other genes during ovarian development. A final  
235 examination was performed to search for evidence of a generalised and genome  
236 wide association between gene expression levels and methylation status.  
237 Expression for all genes with either differential gene body or promoter methylation is  
238 shown in Supplementary Fig. S12. We found no correlation for either comparison,  
239 consistent with previous studies that reported weak correlation between DNA  
240 methylation and gene expression in humans<sup>36,37</sup> and more recently in fish<sup>38</sup>. Taken  
241 together, the results confirmed that while methylation alone does not control  
242 genome-wide patterns of gene expression, it plays a key role upregulating a defined  
243 set of genes during the maturation process.

244

### 245 **Early and stable changes in the chromatin state**

246 To deepen the characterization of the epigenomic features during maturation, we  
247 performed ATAC-seq (assay for transposase-accessible chromatin sequencing<sup>39</sup>) to  
248 produce genome-wide maps of chromatin accessibility changes. ATAC-seq was

249 performed for multiple tissues and peak enrichment around transcription start sites  
250 used as the key quality control metric (TSS, Supplementary Figure S13). Following  
251 data pruning, we took 12 liver libraries (3 replicates across all 4 timepoints) and a  
252 total of 699 million uniquely mapped paired-end reads (Supplementary Table S14)  
253 forward into joint analysis with RNA-seq and WGBS data. Principal component  
254 analysis (PCA) of the 12 ATAC-seq samples revealed the T1 replicates formed a  
255 tight cluster positioned separately from the T2 – T4 samples, which were less well  
256 distinguished from each other (Fig. 4a). The first two principal components  
257 accounted for 50% of variation, which is less than the comparative analysis of the  
258 same tissue using RNA-seq (66% Fig. 4a). To characterise changes in chromatin  
259 state following long light initiation, we defined differentially accessible regions  
260 (DARs) where mapping counts differed significantly between T1 and other time  
261 points. This revealed a strong early remodelling in the chromatin state landscape, as  
262 most DARs were observed at T2 (n=1501) before decreasing in stepwise fashion at  
263 T3 (n=477) and T4 (n=148; Fig.4b; Supplementary Table S15). The direction of  
264 change was approximately balanced between DARs with increased and decreased  
265 accessibility, broadly matching the balance between up and down regulated global  
266 gene expression changes observed for liver (Fig. 2a). We next asked if the early  
267 changes in chromatin state persisted throughout the time course using hierarchical  
268 clustering. The majority of DARs (n=1036 or 57%) exhibit reduced accessibility at T2  
269 compared with T1 and subsequently remained unchanged at later time points (Fig.  
270 5a; Supplementary Figure S14). Similarly, regions that gained accessibility at T2  
271 (n=696 or 38%) also remained unchanged at later timepoints. This left less than 10%  
272 of DARs (n=99) that displayed an oscillating pattern following the onset of the  
273 maturation. Together, this revealed the ATAC-seq signatures were predominantly

274 stable chromatin state changes, as opposed to pulsatile epigenomic changes that  
275 snapped back after a small number of days or weeks.

276

277 **Differential chromatin accessibility strongly correlates with bidirectional**  
278 **regulation of global gene expression**

279 To begin exploring the relationship between chromatin accessibility changes and  
280 gene expression, we first mapped the genomic location of DARs and found the  
281 majority were located in genes (65%) or within 5 kb upstream (6%) or 5 kb  
282 downstream (4%), affirming the quality of the ATAC-seq dataset. We also detected a  
283 quarter of DARs (25%) located on average 36 kb distal to their nearest gene, a low  
284 proportion in comparison to domesticated terrestrial livestock <sup>40</sup>. Starting with the  
285 subset of DARs located in genes (exons and introns) we found the proportion of  
286 variation in gene expression explained by chromatin accessibility changes was high  
287 (Fig. 4c, d). For example, chromatin state changes at T2, compared with T1,  
288 explained 56% of the variation in gene expression using linear regression. The  
289 dynamic was bidirectional, with accessibility changes associated with both up and  
290 down regulation of global gene expression, and strongest at the early timepoint T2  
291 (Fig. 4c). We repeated the analysis for DARs located within 5 kb of transcription start  
292 sites to assess the strength of association with physically proximal putative cis-  
293 regulatory elements (CREs). These had even higher association, explaining  
294 approximately 60% of the variation in global gene expression (Supplementary Figure  
295 S15). Together, this clearly demonstrated chromatin state changes played a  
296 dominant role in directing global changes in gene expression.

297

298 **Cis-regulatory elements regulate metabolism genes via chromatin state**

299 **changes**

300 To examine the biological consequence of chromatin state changes, we focused on  
301 CREs given their established role on transcriptional regulation via transcription  
302 factors (TFs) binding (41). We focussed on the subset of CREs that underwent a  
303 change in accessibility during the time course to evaluate i) the expression behaviour  
304 of their closest gene; ii) the biological function of those genes, and iii) any enrichment  
305 for transcription factor binding sites. We found a small subset of CREs ( $n = 65$ )  
306 underwent increased accessibility early in the time course and the majority ( $n = 46$ ;  
307 79%  $\chi^2 p < 8.028 \cdot 10^{-8}$ ) upregulated their nearest gene in a tightly coordinated manner  
308 (Fig. 5a – c). It also appears CREs more tightly controlled the downregulation of  
309 genes compared to DARs located in gene bodies, downstream regions or within  
310 intergenic regions (Fig. 5b, red box; Supplementary Table S16). The gene set  
311 associated with coordinated up regulation (Fig. 5c) exhibited significant GO  
312 enrichment related to lipid metabolism and energy metabolism (AAcyl-CoA  
313 biosynthesis) (Fig. 5d). Acyl-CoA are coenzymes involved in energy synthesis,  
314 consistent with the expectation of liver function through an energetically costly  
315 transition such as maturation.

316

317 To provide a fine-scale view of the coordinated response, a 15 kb region of *Ssa15*  
318 spanning the CRE and exons of a gene that regulates hepatic lipid metabolism  
319 (*hmgcr*)<sup>42</sup> is provided in Figure 5e. The final analysis used HOMER to search for TF  
320 motifs that bind master regulators driving gene transcription<sup>43</sup>. Specifically, we  
321 computed the enrichment of TF motifs in CREs that gained chromatin accessibility  
322 against a background that remained inaccessible. This revealed significant

323 enrichment of 13 motifs, corresponding to the preferred binding sites of specific  
324 transcription factors present in 29 - 58% of targets following the onset of maturation  
325 (Supplementary Figure S16). Among these, the most significant motif matched the  
326 global transcriptional regulator E3 Ubiquitin-Protein Ligase CNOT4 that regulates  
327 essentially every aspect of gene expression, from mRNA synthesis to protein  
328 destruction including the degradation of RNAPII <sup>44</sup>. The results strongly suggest that  
329 chromatin state changes at CREs directly control gene expression in liver and  
330 upregulate energy metabolism genes via changes in TF activity.

331

### 332 **Multomics data integration using gene regulatory networks**

333 The final component of our analysis sought to co-analyse all available data to infer  
334 gene regulatory networks (GRNs) responsible for the onset of maturation. GRNs  
335 provide a platform for integrating multiomic data and can be used to characterize the  
336 dynamics of perturbations during biological transitions such as puberty and other  
337 complex traits <sup>45,46,47,48,49</sup>. Here, we used the approach to co-analyse genes with  
338 evidence of differential behaviour using seven categories that included expression  
339 (DEGs), changed methylation at gene bodies (DMGs) or promoters (DMPs) and  
340 differential chromatin accessibility (DACs). To focus the analysis towards  
341 investigation of key regulators, we also performed regulatory impact factor (RIF)  
342 analysis. This used co-expression correlation between TFs and their target  
343 differentially expressed genes to identify 305 significant regulators (Supplementary  
344 Table S17; Supplementary Figure S17). Of the seven categories, the majority of  
345 1,858 genes prioritised for GRN construction were DEG (n = 1,400) or DMG (n =  
346 700). The overlap between categories, for example where genes were both DEG  
347 and DMG (n = 442), is given in Fig 6.a. The gene set showed significant GO

348 enrichment (1 GO-CC and 8 GO-MF terms) to hormone activity and steroid hormone  
349 receptor activity (Fig. 6b) and their expression patterns showed clear tissue-specific  
350 clustering (Supplementary Fig.S18a) suggesting biological relevance to the trait.  
351 GRN construction using the 1,858 genes yielded 835,084 connections with a mean  
352 of 449 connections per gene. For visualisation, we only considered genes with  
353 significant correlations  $\geq \pm 0.95$  (929 gene with 17,708 connections) (Supplementary  
354 Fig.S18b). Most network genes (N=777, ~42 %) belonged to pituitary compared to  
355 33% and 25% in ovary and liver. These figures also were reflected in the number of  
356 connections per tissue (Supplementary Fig.S18c). Genes with the highest change in  
357 the number of connections are likely to be key regulators, and the top 20 included  
358 five zinc finger proteins (Supplementary Table S18.) Two of these transcription  
359 factors, znf664 and znf239, were expressed in pituitary suggesting their key role in  
360 maturation onset. Interestingly, the most highly connected genes also included two  
361 uncharacterised (dark) Atlantic salmon genes (106590493, 106612553) that  
362 displayed maximum expression in ovary.

363

### 364 **Differential GRN connectivity identifies key regulatory factors**

365 Key regulators are likely to undergo substantial change in their number of  
366 connections and identify gene networks driving the transition to maturation. This  
367 prompted construction of separate networks using pre- and post-maturation stage  
368 data, before identifying those genes that underwent the largest change in  
369 connectivity (pipeline workflow is provided in Supplementary Figure S1b). For  
370 visualisation purposes, we only included 10% of the most significant connections that  
371 included 1,412 genes with 17,260 connections in the pre-maturation GRN and 1,310  
372 genes with 22,059 connections in the post-maturation GRN (Fig. 6c). Next, we

373 computed the differences in the patterns among the tissues comprising the two  
374 networks (Fig.6c). The pituitary gland and ovary had the most abundance (~ 45%  
375 and 32%, respectively) of connections compared to a lower percentage of  
376 connections (~23%) in liver after maturation. We computed the differential  
377 connectivity for all genes and identified the most differentially connected genes  
378 (DCGs) (n=186 genes; 10%) (Supplementary Table S18) between the pre and post-  
379 maturation networks with more connections: 80,536 in post-maturation compared to  
380 pre-maturation network with 56,971. These were mainly expressed in pituitary (44%)  
381 and most connections involved DEGs (74%) and DMGs (47%). Finally, we identified  
382 regulators that gained the most connections post-maturation (Table 1, Fig. 6). The  
383 top ranked regulator was *trim25* (encodes a ubiquitin E3 ligase) and underwent a  
384 profound change in connectivity (from 10 to 599). *znf423* is a ZF-TF with multiple  
385 roles in signal transduction during development. It was predominantly expressed in  
386 pituitary and contributed to 3 categories in the network (DEG, TF, DAC) with multiple  
387 roles in signal transduction during development and a salmon dark gene highly  
388 expressed in ovary (Fig. 6d). Then, we focused on TFs contained among the top 10  
389 regulators that were differential connected genes between the pre and post-  
390 maturation networks. This revealed *znf423* to be the most differentially connected TF  
391 (from 58 to 576) and Krueppel-like factor 11 (*klf11*) as the least differentially  
392 connected TF (from 513 to 9) (Fig. 6e; Table 1). Enrichment of motifs for a ubiquitin  
393 E3 ligase (*cnot4*) and ZNF TF (*Zic*) among ATAC-seq signals at CREs confirms their  
394 regulatory roles. Several studies have previously demonstrated roles for ZNF factors  
395 in controlling onset of female puberty in many species including humans <sup>50,51,52,53</sup>.  
396  
397



## 398 **Discussion**

399

400 Identifying the biological mechanisms controlling complex traits is a sizable  
401 challenge. We designed our study on the assumption that the dynamic network of  
402 molecules coordinating the spatiotemporal changes driving sexual maturation would  
403 be inaccessible to investigation using only a single layer of “omics”. We anchored the  
404 study around the collection of tissue transcriptomes to visualize their changing  
405 circuitry across the period where Atlantic salmon commence their trajectory towards  
406 sexual maturation. Importantly, we also characterized the changing epigenomic  
407 landscape through interrogation of DNA methylation and chromatin state changes.  
408 Integration of the resulting multiomic dataset used rigorous quantitative approaches,  
409 and when performed inside the context of a defined biological transition, has given  
410 us an unprecedented ability to characterise the onset of maturation at the molecular  
411 level in a non-model species of worldwide aquaculture and ecological importance.

412

413 The availability of dimensional data allowed us to identify the dominant epigenomic  
414 changes controlling gene expression. We conclude that global changes in DNA  
415 methylation had little predictive power to explain changing gene expression beyond a  
416 small subset involved in chromatin remodelling. While methylation changes are a  
417 striking feature of embryonic development, they appear not to have been responsible  
418 for the rapid and numerous changes in gene expression documented here.

419 Conversely, we observed high correlation between chromatin state changes and  
420 altered gene expression for the single tissue with ATAC-seq data (liver). The  
421 correlation was highest for differentially accessible regions immediately adjacent to  
422 coding genes, implicating *cis*-regulatory elements.

423

424 The identification of key genes relied on characterisation of differential behaviour  
425 using samples collected before, and after, fish were subjected to a  
426 photomanipulation trigger designed to stimulate maturation. Multiple data patterns  
427 confirm we successfully initiated early stage maturation. Increasing average  
428 gonadosomatic index demonstrates a physiological response occurred, and this was  
429 paralleled by significant global upregulation of gene expression in the ovary and a  
430 more modest remodelling of the pituitary transcriptome. Together, this provided  
431 confidence that the characterised DEG, DMG and DAC patterns are likely to  
432 successfully implicate genes directly involved in maturation. We showed  
433 upregulation of pituitary hormones including gonadotropins along with other pituitary  
434 genes involved in a range of reproduction related functions including  
435 steroidogenesis. Differentially methylated genes were enriched for follicular  
436 development and the control of gonadotropin-releasing hormone excitability.  
437 Integrated transcriptome and methylome analysis in ovary implicated chromatin  
438 remodelling genes in controlling maturation. Finally, differentially accessible CREs in  
439 liver were enriched for lipid metabolism and energy metabolism genes.

440

441 Despite the advantages of the multiomic approach used, limitations may be imposed  
442 by the range of tissues, timepoints and technical features of the assays used. For  
443 example, we treated tissues as homogenous entities in an approach that ignores the  
444 spectrum of constituent cell types and their differentiated roles that single-cell  
445 multiomic studies have begun to explore<sup>17,54</sup>. Further, suboptimal partitioning of the  
446 brain at dissection hampered our ability to assign the role of the hypothalamus  
447 separately from the brain stem, cerebellum and olfactory bulb. Consequently, the

448 variation in whole brain transcriptomes among replicates within timepoint was so  
449 large as to prevent meaningful analysis. Finally, we were unable to generate high  
450 quality chromatin state data from ovary samples despite repeated attempts. An  
451 incomplete compendium of tissues and datatypes has resulted in an imperfect view  
452 of the changing epigenomic landscape.

453

454 The promise of multiomic data will remain unfulfilled without methodological  
455 approaches capable of identifying system perturbations associated with phenotypic  
456 change. Here, we used a gene regulatory network approach which has proven  
457 successful for investigation of puberty and other complex traits <sup>47,48,49</sup>. We identified  
458 *trim25*, a gene encoding a ubiquitin E3 ligase, as the network element undergoing  
459 the most dramatic change in connectivity and strongly suggests it plays a key role.  
460 Looking forwards, it is tempting to speculate that a number of the genes identified  
461 represent high value targets for manipulation via gene editing in an attempt to delay  
462 or ablate sexual maturation. Among the range of putative targets identified, the core  
463 components of the SWI/SNF chromatin remodelling complex (*arid1B* and *smarca2*)  
464 are appealing due to their ability to exert wide ranging change in gene expression.  
465 The results described may therefore lead to better management of unwanted early  
466 maturation within an aquaculture setting where the completion of maturation is  
467 associated with reduced product quality and production inefficiencies.

468

469

470

## 471 References

- 472 1. The ENCODE Project Consortium. An integrated encyclopedia of DNA elements in  
473 the human genome. *Nature* **489**, 57–74 (2012).
- 474 2. Kundaje, A. et al. Integrative analysis of 111 reference human epigenomes. *Nature*  
475 **518**, 317–330 (2015).
- 476 3. Stunnenberg, H. G. & Hirst, M. The International Human Epigenome Consortium: a  
477 blueprint for scientific collaboration and discovery. *Cell* **167**, 1145–1149 (2016).
- 478 4. Yue, F. et al. A comparative encyclopedia of DNA elements in the mouse genome.  
479 *Nature* **515**, 355–364 (2014).
- 480 5. Wu, J. et al. The landscape of accessible chromatin in mammalian preimplantation  
481 embryos. *Nature* **534**, 652–657 (2016).
- 482 6. Gorkin, D. et al. Systematic mapping of chromatin state landscapes during mouse  
483 development. Preprint at bioRxiv [https://www.biorxiv.org/ content/10.1101/166652v1](https://www.biorxiv.org/content/10.1101/166652v1)  
484 (2017).
- 485 7. Henikoff, J. G., Belsky, J. A., Krassovsky, K., Macalpine, D. M. & Henikoff, S.  
486 Epigenome characterization at single base-pair resolution. *Proc. Natl Acad. Sci. USA*  
487 **108**, 18318–18323 (2011).
- 488 8. Rivera, J., Keränen, S. V. E., Gallo, S. M. & Halfon, M. S. REDfly: the  
489 transcriptional regulatory element database for *Drosophila*. *Nucleic Acids Res.* **47**  
490 **(D1)**, D828–D834 (2019)
- 491 9. Widmann, P. et al. A systems biology approach using metabolomic data reveals genes  
492 and pathways interacting to modulate divergent growth in cattle. *BMC Genomics* **14**,  
493 798 (2013).
- 494 10. Cánovas, A. et al. Multi-tissue omics analyses reveal molecular regulatory networks  
495 for puberty in composite beef cattle. *PLoS One* **9**, e102551 (2014).
- 496 11. Nguyen, L. T. et al. STAT6, PBX2, and PBRM1 emerge as predicted regulators of  
497 452 differentially expressed genes associated with puberty in brahman heifers. *Front.*  
498 *Genet.* **9**, 87 (2018).
- 499 12. Schenk, S. et al. Combined transcriptome and proteome profiling reveals specific  
500 molecular brain signatures for sex, maturation and circalunar clock phase. *eLife* **8**,  
501 e41556 (2019).
- 502 13. Gutierrez, A.P. et al. Genome-wide association study (GWAS) for growth rate and  
503 age at sexual maturation in Atlantic salmon (*Salmo salar*). *PLoS One* **10**, 3 (2015).
- 504 14. Barson, N.J. et al. Sex-dependent dominance at a single locus maintains variation in  
505 age at maturity in salmon. *Nature* **528(7582)**, 405–8 (2015).
- 506 15. Ayllon, F. et al. The *vgl13* locus controls age at maturity in wild and domesticated  
507 Atlantic salmon (*Salmo salar* L.) males. *PLoS Genet.*, **11(11)**, e1005628 (2015).

- 508 16. Mohamed, A.R. et al. Polygenic and sex specific architecture for two maturation traits  
509 in farmed Atlantic salmon. *BMC Genomics* **20**, 139 (2019).
- 510 17. Argelaguet, R. et al. Multi-omics profiling of mouse gastrulation at single-cell  
511 resolution. *Nature* <https://doi.org/10.1038/s41586-019-1825-8> (2019).
- 512 18. Lloyd-Price, J. et al. Multi-omics of the gut microbial ecosystem in inflammatory  
513 bowel diseases. *Nature* **569**, 655–662 (2019).
- 514 19. Randall, C. F., Bromage, N. R., Duston, J. & Symes, J. Photoperiod induced  
515 phaseshifts of the endogenous clock controlling reproduction in the rainbow trout: a  
516 circannual phase-response curve. *Journal of Reproduction and Fertility* **112**:399–405  
517 (1998).
- 518 20. King, H.R., Lee, P.S., Pankhurst, N.W. Photoperiod-induced precocious male sexual  
519 maturation in Atlantic salmon (*Salmo salar*). *Fish Physiol. Biochem.* **28**, 427–428  
520 (2003).
- 521 21. Veldhuis, J. D. Changes in pituitary function with ageing and implications for patient  
522 care. *Nat. Rev. Endocrinol.* **9**, 205–215 (2013).
- 523 22. Suzuki, K., Kawauchi, H. & Nagahama, Y. Isolation and characterisation of two  
524 distinct gonadotropins from chum salmon pituitary glands. *General and Comparative*  
525 *Endocrinology* **71**, 292–301 (1988a).
- 526 23. Suzuki, K., Nagahama, Y., Kawauchi, H. Steroidgenic activities of two distinct  
527 salmon gonadotropins. *Gen. Comp. Endocrinol.* **71**, 452–458 (1988b).
- 528 24. Swanson, P., Bernard, M.G., Nozaki, M., Suzuki, K., Kawauchi, H., Dickhoff, W.W.  
529 Gonadotropins I and II in juvenile coho salmon. *Fish Physiology and Biochemistry* **7**,  
530 169–176 (1989).
- 531 25. Levavi-Sivan, B., Bogerd, J., Mañanós, E. L., Gómez, A. & Lareyre, J. J. Perspectives  
532 on fish gonadotropins and their receptors. *Gen. Comp. Endocrinol.* **165**, 412–437  
533 (2010).
- 534 26. Zhou, F. et al. Reconstituting the transcriptome and DNA methylome landscapes of  
535 human implantation. *Nature* **572**, 660–664 (2019).
- 536 27. Ortega-Recalde, O., Day, R. C., Gemmill, N. J., and Hore, T. A. Zebrafish preserve  
537 global germline DNA methylation while sex-linked rDNA is amplified and  
538 demethylated during feminisation. *Nat. Commun.* **10**, 3053 (2019).
- 539 28. Kim, M. & Costello, J. DNA methylation: an epigenetic mark of cellular memory.  
540 *Exp. Mol. Med.* **49**, e322 (2017).
- 541 29. Shipony, Z. et al. Dynamic and static maintenance of epigenetic memory in  
542 pluripotent and somatic cells. *Nature* **513**, 115–119 (2014).
- 543 30. Regev, A., Goldman, S., Shalev, E. Semaphorin-4D (Sema-4D), the Plexin-B1 ligand,  
544 is involved in mouse ovary follicular development. *Reprod. Biol. Endocrinol.* **5**, 12  
545 (2007).

- 546 31. Iremonger, K.J., Constantin, S., Liu, X. Herbison AE Glutamate regulation of GnRH  
547 neuron excitability. *Brain Res.* **1364**, 35–43 (2010).
- 548 32. Neri, F. et al. Intragenic DNA methylation prevents spurious transcription initiation.  
549 *Nature* **543**, 72–77 (2017).
- 550 33. Arechederra, M. et al. Hypermethylation of gene body CpG islands predicts high  
551 dosage of functional oncogenes in liver cancer. *Nat. Commun.* **9**, 3164 (2018).
- 552 34. Wang, X. et al. SMARCB1-mediated SWI/SNF complex function is essential for  
553 enhancer regulation. *Nat. Genet.* **49(2)**:289-295 (2017).
- 554 35. Kadoch, C. & Crabtree, G. R. Mammalian SWI/SNF chromatin remodeling  
555 complexes and cancer: mechanistic insights gained from human genomics. *Sci. Adv.*  
556 **1**, e1500447 (2015).
- 557 36. Park, J., Xu, K., Park, T., Yi, S.V. What are the determinants of gene expression  
558 levels and breadths in the human genome? *Hum. Mol. Genet.* **21**, 46–56 (2012)
- 559 37. Lou, S. et al. Whole-genome bisulfite sequencing of multiple individuals reveals  
560 complementary roles of promoter and gene body methylation in transcriptional  
561 regulation. *Genome Biol.* **15**, 408 (2014).
- 562 38. Ryu, T., Veilleux, H. D., Donelson, J. M., Munday, P. L. & Ravasi, T. The epigenetic  
563 landscape of transgenerational acclimation to ocean warming. *Nat Clim Change* **8**,  
564 504–509 (2018).
- 565 39. Buenrostro, J. D., Giresi, P. G., Zaba, L. C., Chang, H. Y. & Greenleaf, W. J.  
566 Transposition of native chromatin for fast and sensitive epigenomic profiling of open  
567 chromatin, DNA-binding proteins and nucleosome position. *Nat. Methods* **10**, 1213–  
568 1218 (2013).
- 569 40. Foissac, S. et al . Multispecies annotation of transcriptome and chromatin structure in  
570 domesticated animals. *BMC Biol.***17**,108 (2019).
- 571 41. Buecker, C. & Wysocka, J. Enhancers as information integration hubs in  
572 development: lessons from genomics. *Trends Genet.* **28**, 276–284 (2012).
- 573 42. De Jesus DF, et al. Parental metabolic syndrome epigenetically reprograms offspring  
574 hepatic lipid metabolism in mice. *J. Clin. Invest.* **130(5)**, 2391-2407 (2020).
- 575 43. Marnetto, D. et al. Evolutionary rewiring of human regulatory networks by waves of  
576 genome xpansion. *Am. J. Hum. Genet.* **102**, 207–218 (2018).
- 577 44. Jiang, H., Wolgast, M., Beebe, L., Reese, J. Ccr4–Not maintains genomic integrity by  
578 controlling the ubiquitylation and degradation of arrested RNAPII. *Genes Dev.* **33**,  
579 705–717 (2019).
- 580 45. Barabasi, A. L., Gulbahce, N. & Loscalzo, J. Network medicine: a network-based  
581 approach to human disease. *Nature Rev. Genet.* **12**, 56–68 (2011).
- 582 46. Cánovas, A. et al. Multi-tissue omics analyses reveal molecular regulatory networks  
583 for puberty in composite beef cattle. *PLOS One* **9**, e102551 (2014).

- 584 47. Alexandre, P. A. et al. Systems biology reveals NR2F6 and TGFB1 as key regulators  
585 of feed efficiency in beef cattle. *Front. Genet.* **10**, 230 (2019).
- 586 48. Hawe, J. S., Theis, F. J. & Heinig, M. Inferring interaction networks from Multi-  
587 Omics Data. *Front. Genet.* **12**, 1–13 (2019).
- 588 49. Lau, L. Y. et al. Dynamics of Gene Co-expression Networks in Time-Series Data: A  
589 Case Study in *Drosophila melanogaster* Embryogenesis. *Front. Genet.* **11**, 517  
590 (2020).
- 591 50. Demerath, E.W. et al. Genome-wide association study of age at menarche in African-  
592 American women. *Hum. Mol. Genet.* **22**, 3329–46 (2013).
- 593 51. Perry, J.R. et al. Parent-of-origin-specific allelic associations among 106 genomic loci  
594 for age at menarche. *Nature* **514**, 92–97 (2014).
- 595 52. Lomniczi, A. et al. Epigenetic control of female puberty. *Nat. Neurosci.* **16**, 281–289  
596 (2013).
- 597 53. Fortes M.R.S. et al. Transcriptome analyses identify five transcription factors  
598 differentially expressed in the hypothalamus of post-versus pre-pubertal Brahman  
599 heifers. *Journal of Animal Science* **94**, 3693–702 (2016).
- 600 54. Chappell, L., Russell, A. J. C. & Voet, T. Single-cell (multi)omics  
601 technologies. *Annu. Rev. Genom. Hum. Genet.* **19**, 15–41 (2018).

602

603

604

## 605 **Methods**

606

### 607 **Induction of maturation through photoperiod manipulation and tissue**

#### 608 **sampling**

609 Animals were managed using photoperiod manipulation to synchronise the timing of  
610 commitment into maturation. A population of female brood stock were used that were  
611 ~ 36 months post fertilization in April 2017. The management of the animals and  
612 associated timeline for sampling events is given in Fig.1a. In order to measure and  
613 control for variation between individuals, 4 fish (biological replicates) at each of the  
614 four time points (T1-T4) were used. The maturation status of animals (leading up to

615 the long day photoperiod initiation) was monitored by ultrasound. Control samples at  
616 T1 time point were collected on mid-June 2017 before induction of maturation  
617 occurred late-June 2017. Following the application of the long photoperiod, tissues  
618 were sampled at different three time points in 2 weeks intervals (T2-T4). At each  
619 sampling event, the gonadosomatic index GSI was calculated from the ovary mass  
620 as a proportion of the total body mass as follows:  $GSI = [\text{ovary weight} / \text{total body}$   
621  $\text{weight}] \times 100$ .

622

### 623 **RNA isolation, RNA-seq library preparation and sequencing**

624 Tissue samples were preserved in RNA-Later at -80 °C and total RNA was isolated  
625 using RNeasy mini kit (QIAGEN) as previously described<sup>55</sup>. Tissues were lysed  
626 twice in 450 µL of lysis solution on a Precellys 24 homogenizer for 30s at 4.0 ms<sup>-1</sup>.  
627 RNA was bound to a column and washed twice before elution with 40 µL at room  
628 temperature. RNA quantity and quality were assessed using a NanoDrop ND-1000  
629 spectrometer, Qubit 2.0 fluorometer and Agilent 2100 bioanalyzer. Messenger RNA  
630 (mRNA) was isolated from 1 µg of total RNA. 64 RNA-Seq libraries (4 time points x 4  
631 tissues x 4 biological replicates) were prepared using the TruSeq RNA Sample  
632 Preparation Kit (Illumina). Libraries were sequenced on Illumina Nova-Seq 6000  
633 sequencing platform at the Australian Genome Research Facility (AGRF) in  
634 Melbourne, Australia. Sequencing produced a total of 4.4 billion individual 150 bp  
635 paired-end reads and ~ 70 million PE reads per library (Supplementary Table S1).

636

### 637 **Transcriptomic data quality control (QC), genome mapping and read counting**

638 Illumina reads were checked for quality using FastQC software. High quality reads  
639 (Q>30) were mapped to the Atlantic salmon genome ICSASG\_v2<sup>56</sup> using TopHat2



640 version 2.1.1 <sup>57</sup> with default parameters. Alignment files in BAM format were sorted  
641 by read name and converted into SAM format using SAMtools version 1.4 <sup>58</sup>. The  
642 Python package HTSeq version 0.7.2 <sup>59</sup> was applied to count unique reads mapped  
643 to exons using default parameters except for “reverse” with the strandedness.

644

### 645 **Differential gene expression and clustering analyses**

646 Raw counts were analysed using the edgeR package <sup>60</sup> in the R statistical computing  
647 environment to infer differential gene expression among tissues. The four tissues at  
648 the long photoperiod time points (T2, T3 and T4) were compared to the control  
649 samples at T1. *P*-values for differential gene expression were corrected for multiple  
650 testing using the Benjamini and Hochberg algorithm <sup>61</sup>. For further analyses of  
651 differential expression, only genes with a false discovery rate (FDR) of < 0.05 and  
652 have at least absolute  $\log_2(\text{fold change}) > 1$  were considered significant. PCA was  
653 conducted on the lists of significant DEGs using normalised expression data  
654 ( $\log_2\text{FPKM}$ ) using the function `--prin_comp` within trinity. Hierarchical clustering  
655 analysis was conducted using trinity’s utility `analyze_diff_expr.pl` on significant DEGs  
656 in each tissue where mean-centred normalized expression ( $\log_2$ -transformed  
657 FPKM+1) were compared across time points <sup>62</sup>. Gene clusters with similar  
658 expression patterns were obtained using the Perl script  
659 `define_clusters_by_cutting_tree.pl` within trinity to cut the hierarchically clustered  
660 gene tree into clusters with similar expression using the `--Ptree` option.

661

### 662 **Gene Ontology (GO) enrichment of the identified gene clusters**

663 To infer the functions of the gene clusters, gene ontology (GO) enrichment was  
664 performed to identify the enriched biological themes using the R package

665 clusterProfiler version 3.9 using default settings<sup>63</sup>. The ENTREZ gene identifiers of  
666 up- and downregulated clusters per tissue were used as query gene list against the  
667 background genes in each tissue. For the purpose of the enrichment analysis, GO  
668 categories with a corrected *P*-value of < 0.05 were considered significant. Categories  
669 of candidate genes implicated in maturation were visualised as heatmaps using their  
670 normalised expression values with the R package pheatmap version 1.0.12  
671 <https://cran.r-project.org/web/packages/pheatmap/pheatmap.pdf>.

672

### 673 **Genomic DNA isolation, WGBS library preparation and sequencing**

674 Tissue samples were snap frozen in liquid Nitrogen and stored at -80 °C until  
675 genomic DNA (gDNA) was extracted using DNeasy blood and tissue kit (QIAGEN).  
676 Tissues were lysed in 360 µL of lysis solution on a Precellys 24 homogenizer for 30s  
677 at 4.0 ms<sup>-1</sup>. Samples were incubated with 40 µL of Proteinase K enzyme at 56 °C for  
678 1 h. Following lysis, samples were treated with RNase (8 µL of RNase A incubated  
679 for 2 min at room temperature). DNA was bound to the provided columns, washed  
680 twice and eluted in 100 µL at room temperature. gDNA purity were assessed by gel  
681 electrophoresis and NanoDrop ND-1000 spectrometer. DNA concentration and  
682 integrity were assessed using Agilent 2100 bioanalyzer. gDNA was fragmented (200-  
683 400bp) by sonication using Covaris S220, followed by end repair/adenylation and  
684 adapter ligation. Bisulfite modification was performed to the DNA fragments using  
685 the EZ DNA Methylation-Gold™ Kit (Zymo Research, Inc.). Twelve libraries  
686 prepared from 3 tissues (pituitary, ovary and liver), 2 time points (T1 and T4) and 2  
687 biological replicates. Libraries were sequenced on HiSeq 2500 sequencing platform  
688 at Novogene, Hong Kong. Sequencing produced a total of 2.2 billion individual 150

689 bp paired-end reads and 185 M PE reads per library. Bisulfite conversion rates  
690 (percentage of C changed to T after bisulfite treatment) were consistently >99.8%.

691

## 692 **WGBS data QC, genome mapping and methylation calling**

693 Raw data quality control was performed using Trim Galore v0.5

694 ([http://www.bioinformatics.babraham.ac.uk/projects/trim\\_galore/](http://www.bioinformatics.babraham.ac.uk/projects/trim_galore/)) to filter bases (Q

695 scores < 30) and remove both universal and indexed adapter sequences. Processed

696 high-quality data were mapped to into a bisulfite-converted version of the Atlantic

697 salmon reference genome ICSASG\_v2<sup>58</sup> using BSseeker2 v2.1.8<sup>66</sup> with default

698 parameters for aligning paired-end libraries using Bowtie2 (Langmead & Salzberg

699 2012). PCR duplicates were detected and removed using Picard MarkDuplicates

700 (<http://broadinstitute.github.io/picard/>). Filtered (duplicates-free) reads (110 M PE

701 reads) were retained for downstream methylation analysis with an average genome

702 coverage of 11x in pituitary, ovary and liver. Methylation calling was conducted using

703 the Python script *call-methylation.py* within BSseeker2. CGmap files were used for

704 subsequent exploratory and differential methylation analyses. The *mstat* command

705 within CGmap tools was used to generate global and CG context (CG, CHG, CHH)

706 DNA methylation levels<sup>66</sup>.

707

## 708 **DNA methylome exploratory analyses**

709 As CG methylation contributed to the bulk of methylated Cs, average methylation

710 levels of genome-wide CpG positions were calculated in 50 kb bins across the

711 genome using *mbin* command within CGmap tools and plotted as Violin plots using

712 the R package vioplot, <https://cran.r-project.org/web/packages/vioplot/index.html>. To

713 begin assessment of the quality of our libraries, common CpGs with minimum 10x

714 coverage among the 12 samples were used in PCA using *prcomp* implemented in R.  
715 Correlation matrices (based on Pearson coefficient) were prepared using the R  
716 package *corrplot* (<https://cran.r-project.org/web/packages/corrplot/index.html>).  
717 Hierarchical clustering analysis was conducted with *hclust* implemented in R using  
718 compute linkage and Euclidean distances.

719

## 720 **Differential CpG methylation analysis**

721 The R package DSS was used to identify differential methylation regions using  
722 common CpGs<sup>67</sup>. In each tissue, two replicates at T4 were compared to the control  
723 samples at T1 based on CpG methylation levels. At each CpG site, the methylation  
724 (M) level was calculated as a proportion of the total counts (coverage) as follows:  $M$   
725 levels = [methylated counts / total counts] × 100. DSS was selected as it takes into  
726 account the biological variation among replicates (characterized by a dispersion  
727 parameter) and the sequencing depth. Differentially methylated loci (DMLs) were  
728 identified by estimating mean methylation for all CpG sites followed by estimating  
729 dispersion at each site and conducting a Wald test ( $P < 0.001$ ). Smoothing  
730 (combining information from nearby CpG sites to improve the estimation of  
731 methylation levels) was utilised to obtain mean methylation estimates in WGBS data  
732 where the CpG sites are dense. Based on the DML results, regions with statistically  
733 significant CpG sites were identified as a differentially methylated regions (DMRs)  
734 with minimum length/distance of 50 bp and minimum CpG coverage of 3. Mean  
735 methylation between groups of greater than 10 % ( $\Delta = 0.1$ ) and  $P < 0.001$  was  
736 considered significant. A circos plot was produced to visualize multi-tissue genome-  
737 wide DMRs using Circos (<http://circos.ca/software/>). Individual DMRs were also  
738 visualized using the *showOneDMR* function within the DSS package to plot both the

739 methylation percentages (including a smoothed curve) as well as the coverage  
740 depths at each CpG site.

741

#### 742 **DMR annotation, DMGs and DEGs correspondence analysis**

743 Differentially methylated regions were compared against the protein coding gene set  
744 annotated on reference ICSASG\_v2 using custom Perl scripts. This classified DMRs  
745 as overlapping a gene body (genic), 5kb upstream of a transcription start site TSS  
746 (putative promoter), 5 kb downstream of TSS (5kb downstream), or otherwise  
747 intergenic. The distance between each DMR and nearest gene is provided in  
748 Supplementary tables 9 – 11. The overlap between significant genes from differential  
749 expression and methylation was checked using the *intersect* function within bedtools  
750 <sup>68</sup>.

751

752

753

#### 754 **GO enrichment of DMGs**

755 GO enrichment analyses were conducted on both the sets of hypermethylated genes  
756 (n= 1,156) and genes found to be hypermethylated and upregulated in ovary (n=  
757 148) using the R package clusterProfiler. Genes driving GO enrichment were plotted  
758 as a heatmap using the R package pheatmap as above.

759

#### 760 **Nuclei extraction, ATAC-seq library preparation and sequencing**

761 ATAC-seq libraries were prepared from frozen tissues using the Omni-ATAC method  
762 <sup>69</sup> with the following modifications. Frozen tissue (20 mg) was ground in liquid  
763 nitrogen using a mortar and pestle. The pulverized tissue was transferred to a pre-

764 chilled 2 ml dounce homogenizer containing 1mL cold 1x homogenisation buffer and  
765 homogenised with the pestle to form a uniform suspension (10-20 strokes). The  
766 homogenate was filtered with a 40uM nylon cell strainer (BD Falcon) before layering  
767 onto the iodixanol solution as described previously <sup>69</sup>. The ratio of nuclei to enzyme  
768 concentration was optimised for each sample by performing transposition reactions  
769 containing 50000, 100000 and 200000 nuclei with 2.5ul of tagment enzyme in 50ul of  
770 transposition mix <sup>69</sup>. The transposed DNA was amplified with custom primers as  
771 described elsewhere <sup>70</sup>. before libraries were purified using Agencourt AMPure XP  
772 beads (Beckman Coulter) and quality controlled using a Bioanalyser High Sensitivity  
773 DNA Analysis kit (Agilent). Twelve liver ATAC-seq libraries arising from 3 biological  
774 replicates x 4 time points (T1-T4) were sequenced at the IMB sequencing facility  
775 (University of Queensland) on an Illumina NextSeq 150 cycle (2 X 75 bp).

776

777

### 778 **Chromatin accessibility data QC, genome mapping and peak calling**

779 Sequencing produced a total of 1.2 billion individual paired-end reads  
780 (Supplementary Table 14). Raw reads were mapped to the Atlantic salmon reference  
781 genome ICSASG\_v2 <sup>58</sup> using BOWTIE2 version 2.3.5.1 with the *--very-sensitive*  
782 parameter <sup>71</sup>. Duplicate reads were removed using the MarkDuplicates function in  
783 Picard (<http://broadinstitute.github.io/picard/>). Multi-mapped reads and mitochondrial  
784 reads were filtered out and only uniquely mapped reads (MAPQ > 10) were extracted  
785 from alignment files using SAMTOOLS for downstream analyses.

786

787 For peak calling, the model-based analysis of ChIP-seq (MACS2)

788 (<https://github.com/macs3-project/MACS>) was used to identify read enrichment

789 regions “peaks” using default parameters. Only peaks detected in at least two  
790 replicates per condition were used for downstream analyses, and peaks across  
791 timepoints were merged to generate a unique peak list per tissue. The number of  
792 raw reads mapped to each peak was quantified using the Python package HTSeq  
793 version 0.11.1 <sup>59</sup>.

794

### 795 **Differential accessibility and clustering analyses**

796 Samples from the long photoperiod time points (T2, T3 and T4) were compared to  
797 control samples (T1) for each tissue. Raw counts were analysed using the R  
798 package edgeR and P-values were corrected for multiple testing using the Benjamini  
799 and Hochberg algorithm. Peaks with FDR < 0.05 and  $\log_2FC > \pm 1$  were considered  
800 significantly differentially accessible regions (DARs). PCA of significant DARs used  
801 normalised accessibility data ( $\log_2CPM$ ) prepared using the function *--prin\_comp*  
802 within trinity. Hierarchical clustering analysis was conducted using  
803 *analyze\_diff\_expr.pl* where mean-centred normalized accessibility ( $\log_2CPM+1$ ) were  
804 compared across time points <sup>62</sup>. Gene clusters with similar accessibility patterns  
805 were obtained using the Perl script *define\_clusters\_by\_cutting\_tree.pl* to cut the  
806 hierarchically clustered gene tree into clusters with similar accessibility patterns as  
807 described above.

808

### 809 **Genomic distribution of DARs within clusters**

810 Hierarchical clustering identified both accessible and inaccessible DAR clusters.  
811 DARs per cluster were annotated in a genomic context (genic, promoter, 5 kb  
812 downstream or intergenic) as previously done for annotation of DMRs.

813

## 814 **ATAC-seq and RNA-seq correspondence analysis**

815 Only DARs co-located with genes and promoters were used for co-analysis with  
816 gene expression data. The relationship between accessibility of DARs and gene  
817 expression was visualised by overlying information of significant DARs to genome-  
818 wide normalised expression estimates in liver samples and plotted as a MA-biplot. A  
819 linear regression analyses were performed to assess correlations between  
820 accessibility and expression abundance and the effect of changes in accessibility  
821 and changes in gene expression across time. Chromatin accessibility and gene  
822 expression data were visualised using Gnuplot version 5.0.7  
823 (<http://www.gnuplot.info>) by overlying accessibility data of significant DARs at genes  
824 and promoters to genome-wide normalised expression estimates at each timepoint.

825

826

827

## 828 **Multomic heatmap analysis per time and genomic regions**

829 All heatmaps were produced using the R package pheatmap. GO enrichment  
830 analyses have been conducted on the set of nearest genes to accessible promoters  
831 using the R package clusterProfiler as described above. The integrated genome  
832 viewer (IGV) was used to visualise the relationship between accessibility and gene  
833 expression in a 15kb region that contains *hmgrc* gene and its promoter region.

834

## 835 **Motif enrichment analyses**

836 The function *findMotifsGenome.pl* within Homer software version 4.11  
837 (<http://homer.ucsd.edu/homer/>) was used with default parameters to find sequence  
838 motifs significantly enriched among accessible DARs vs inaccessible DARs located



839 within promoter regions. TF motifs that are highly enriched ( $P$  value  $< 1 \times 10^{-10}$ ) were  
840 selected.

841

### 842 **Inference of master regulators**

843 Master regulator analysis was performed using regulatory impact factor (RIF) metrics  
844 described by <sup>72</sup> to identify key regulators contributing to the differential expression in  
845 the T4 vs T1 comparison in each tissue. Data for potential transcription factors (TFs)  
846 in Atlantic salmon were taken from Mohamed et al., 2018. As most of the  
847 transcriptional changes were detected at T4, RIF was applied to the T4-T1  
848 comparisons for each tissue. Briefly, RIF exploits the differential co-expression  
849 concept where regulators were contrasted against unique lists of genes that were  
850 differentially expressed at T4 in each tissue. Genes with a mean expression FPKM  
851  $< 0.2$  were excluded. Those scores deviating  $\pm 2.57$  standard deviation from the  
852 mean were considered significant at  $P < 0.01$ . We identified a total of 305 significant  
853 regulators (113, 68 and 123 in pituitary, ovary and liver, respectively at  $P > 0.01$ ).  
854 Most of these regulators ( $n=298$ ; 97.7%) were unique to each tissue leaving only 7  
855 that were shared among tissue pairs (Supplementary Table S17; Supplementary  
856 Figure S17). The regulators identified were used as input for construction of gene  
857 regulatory networks as summarized in Supplementary Figure S1b.

858

### 859 **Gene regulatory network (GRN) analysis**

860 Genes from different omics analyses (DEGs, DMGs, DMPs, DACs) along with key  
861 transcription factors identified by RIF (TFs), as well as information for tissue-specific  
862 (TS) genes and gene-harboring GWAS SNPs (SNPs) were selected based on  
863 overlap (at least once) and mean normalised expression (at least 0.2 FPKM) for

864 network construction. The R package UpSetR ([https://cran.r-](https://cran.r-project.org/web/packages/UpSetR/vignettes/basic.usage.html)  
865 [project.org/web/packages/UpSetR/vignettes/basic.usage.html](https://cran.r-project.org/web/packages/UpSetR/vignettes/basic.usage.html)) was used to  
866 investigate the cross-talk among genes from different sources.  
867 For gene network inference, genes were used as nodes and significant connections  
868 (edges) between them were identified using the Partial Correlation and Information  
869 Theory (PCIT) algorithm <sup>73</sup>, considering all samples. PCIT determinates the  
870 significance of the correlation between two nodes after accounting for all the other  
871 nodes in the network. Connections between gene nodes were accepted when the  
872 partial correlation was greater than two standard deviations from the mean ( $P <$   
873  $0.05$ ). The output of PCIT was visualized using Cytoscape Version 3.7.2 <sup>74</sup>.

874

875 In order to explore differential connectivity during maturation onset, two networks  
876 were created; one using 12 samples at T1 (pre-maturation) and a second using 36  
877 samples at T2, T3 and T4 (post-maturation). The number of connections of each  
878 gene in each network was computed, making it possible to compare the same gene  
879 in the two networks to identify differentially connected genes (DCGs). From these  
880 networks, we explored a series of subnetworks. First subnetworks based on the top  
881 trio genes and the top regulators (TFs) based on their differential connectivity  
882 between pre-and post-maturation. Pre- and post-maturation networks were  
883 constructed from the 12 control samples at T1 and 36 post-maturation (T2-T4)  
884 samples.

885

## 886 References

- 887 55. Mohamed, A.R., King, H., Evans, B., Reverter, A. & Kijas J.W. Multi-Tissue  
888 Transcriptome Profiling of North American Derived Atlantic Salmon. *Front. Genet.*  
889 **9**, 369 (2018).
- 890 56. Lien, S. et al. The Atlantic salmon genome provides insights into rediploidization.  
891 *Nature* **533**, 200 (2016).
- 892 57. Kim, D. et al. TopHat2: accurate alignment of transcriptomes in the presence of  
893 insertions, deletions and gene fusions. *Genome Biol.* **14**, R36 (2009).
- 894 58. Li, H. et al. The sequence alignment/map format and SAMtools. *Bioinformatics* **25**,  
895 2078–2079 (2009).
- 896 59. Anders, S., Pyl, P. T., and Huber, W. HTseq - a Python framework to work with high-  
897 throughput sequencing data. *Bioinformatics* **31**, 166–169 (2015).
- 898 60. Robinson, M. D., McCarthy, D. J., and Smyth, G. K. (2010). edgeR: a Bioconductor  
899 package for differential expression analysis of digital gene expression data.  
900 *Bioinformatics*, **26**, 139–140.
- 901 61. Benjamini, Y. & Hochberg, Y. Controlling the false discovery rate: a practical and  
902 powerful approach to multiple testing. *J. R. Stat. Soc. Series B Stat. Methodol.* **57**,  
903 289–300 (1995).
- 904 62. Haas, B. J. et al. *De novo* transcript sequence reconstruction from RNA-seq using the  
905 Trinity platform for reference generation and analysis. *Nat. Protoc.* **8**, 1494–1512  
906 (2013).
- 907 63. Yu, G., Wang, L. G., Han, Y. & He, Q. Y. clusterProfiler: an R package for  
908 comparing biological themes among gene clusters. *OMICS* **16**, 284–287 (2012).
- 909 64. Guo, W. et al. BS-Seeker2: a versatile aligning pipeline for bisulfite sequencing  
910 data. *BMC Genomics* **14**, 774 (2013).

- 911 65. Langmead, B. & Salzberg, S.L. Fast gapped-read alignment with Bowtie 2. *Nat.*  
912 *Methods* **9**, 357–359 (2012).
- 913 66. Guo, W., Zhu, P., Pellegrini, M., Zhang, M. Q., Wang, X., and Ni, Z. (2018).  
914 CGmapTools improves the precision of heterozygous SNV calls and supports allele-  
915 specific methylation detection and visualization in bisulfite-sequencing  
916 data. *Bioinformatics* **34**, 381–387
- 917 67. Feng, H., Conneely, K. N. & Wu, H. A Bayesian hierarchical model to detect  
918 differentially methylated loci from single nucleotide resolution sequencing  
919 data. *Nucleic Acids Res.* **42**, e69 (2014).
- 920 68. Quinlan, A. R. BEDTools: the Swiss-army tool for genome feature analysis. *Curr.*  
921 *Protoc. Bioinformatics* **47**, 11–34 (2014).
- 922 69. Corces, M. R. et al. An improved ATAC-seq protocol reduces background and  
923 enables interrogation of frozen tissues. *Nat. Methods* **14**, 959–962 (2017).
- 924 70. Buenrostro, J. D. et al. Single-cell chromatin accessibility reveals principles of  
925 regulatory variation. *Nature* **523**, 486–490 (2015).
- 926 71. Langmead, B. & Salzberg, S.L. Fast gapped-read alignment with Bowtie 2. *Nat.*  
927 *Methods* **9**, 357–359 (2012).
- 928 72. Reverter, A., Hudson, N. J., Nagaraj, S. H., Perez-Enciso, M. & Dalrymple, B. P.  
929 Regulatory impact factors: unraveling the transcriptional regulation of complex traits  
930 from expression data. *Bioinformatics* **26**, 896–904 (2010).
- 931 73. Reverter, A. & Chan, E.K.F. Combining partial correlation and an information theory  
932 approach to the reversed engineering of gene co-expression  
933 networks. *Bioinformatics* **24**, 2491–2497 (2008).
- 934 74. Shannon, P. et al. Cytoscape: a software environment for integrated models of  
935 biomolecular interaction networks. *Genome Res.* **13**, 2498–2504 (2003).

936 **Data availability**

937 Sequencing reads, raw and processed data used in this multiomic study have been  
938 submitted to the NCBI Gene Expression Omnibus (GEO) database under Accession  
939 numbers GSE157003 (combined data types); GSE157001 (RNA-seq); GSE156998  
940 (ATAC-seq) and GSE156997 (whole genome bisulphite sequencing data). Gene  
941 network cystoscope file contains all networks described in the paper is supplied as  
942 supplementary file.

943

944 **Code availability**

945 All codes used for gene expression (RNA-seq;  
946 [https://github.com/AminRM/salmon\\_mat\\_transcriptomes](https://github.com/AminRM/salmon_mat_transcriptomes)), DNA methylation  
947 (WGBS; <https://github.com/AminRM/DNAMethylomes>), chromatin accessibility  
948 (ATAC-seq; <https://github.com/AminRM/Salmon-Chromatin-Accessibility>), gene  
949 networks (GRN; [https://github.com/AminRM/maturation\\_GRN](https://github.com/AminRM/maturation_GRN)) analyses are  
950 available

951

952 **Acknowledgements**

953 We acknowledge the cooperation and assistance provided by Saltas staff who  
954 performed the animal husbandry component of the experiment. The CSIRO Office of  
955 the Chief Executive provided financial support to Amin Mohamed. The work is  
956 dedicated to the memory of Harry King.

957

958 **Author Contribution Statement**

959 AM, HK, BE and JK conceived and designed the experiment. AM generated and  
960 analysed RNA-seq and WGBS data. MM generated ATAC-seq data. AM and MN-S

961 analysed ATAC-seq data. AM and AR analysed the gene regulatory networks. AM  
962 prepared all the figures/tables and prepared the first draft of the manuscript. All  
963 authors reviewed, commented on and approved the final manuscript.

964

#### 965 **Ethics Statement**

966 The fish were reared and euthanized in compliance with the CSIRO Animal Ethics  
967 Committee, under approval number 2017–02.

968

#### 969 **Competing interests**

970 The authors declare no competing interests.

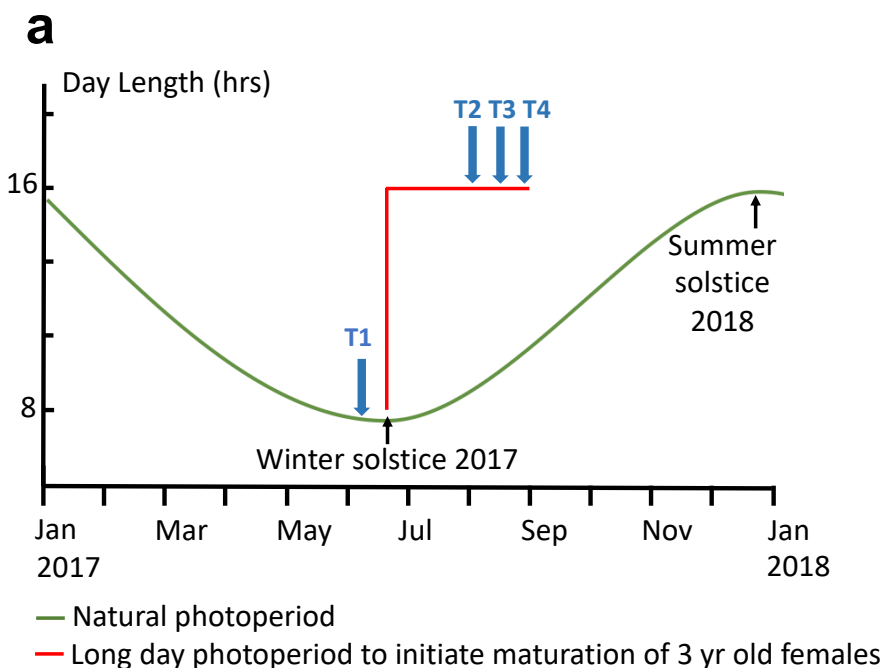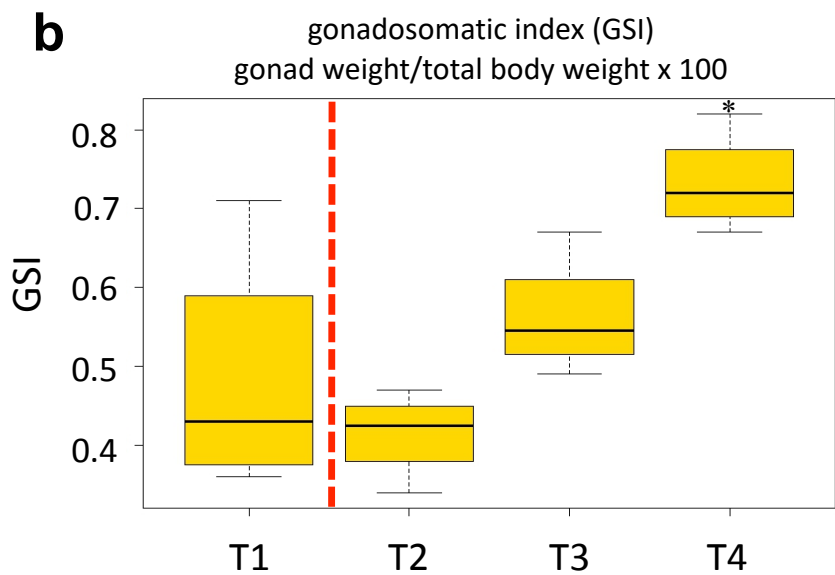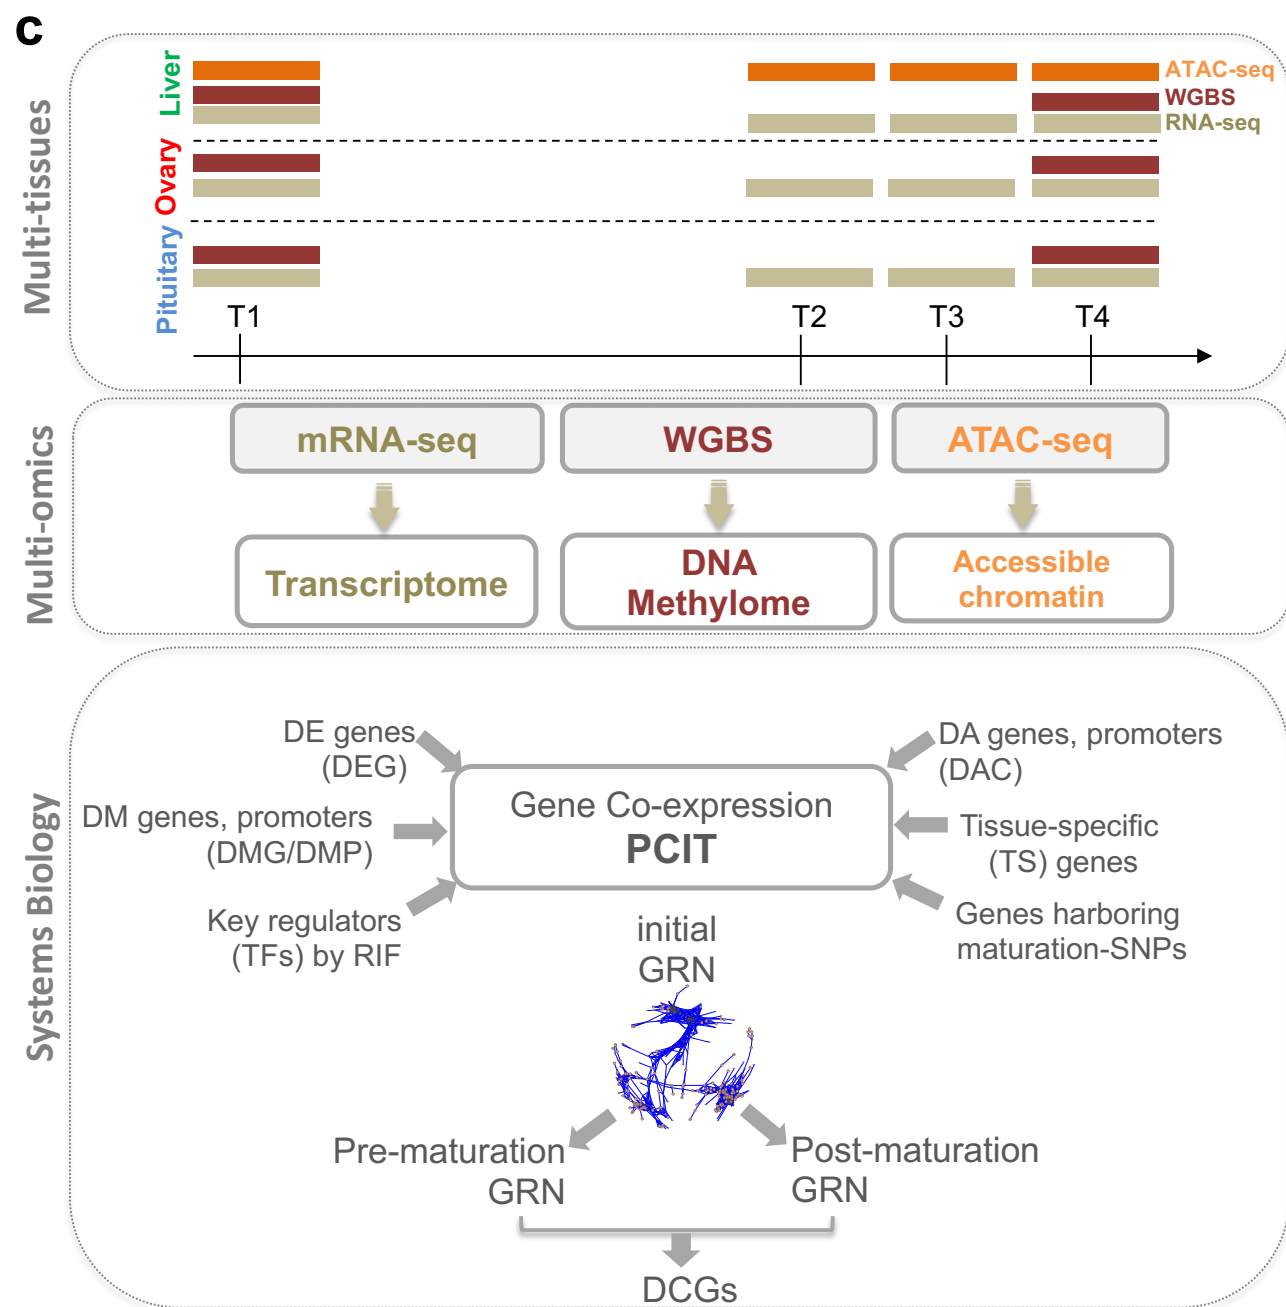

**Fig.1 Multi-tissue transcriptomic and epigenomic changes associated with onset of salmon maturation. a, Induction of maturation through photoperiod manipulation and sampling time points.** Animals were managed via photoperiod manipulation to synchronise the timing of commitment into maturation. 4 fish were sampled at each of the T1 (before long day photoperiod signal) and T2-T4 time points (during maturation) in 2 weeks intervals to control for variation between individuals. **b, Gonadosomatic index (GSI) throughout the time-course experiment.** GSI increased gradually from T2 till the last sampling event at T4 indicating active response towards maturation in these animals. The variability in GSI measures during maturation decreased compared to that of T1. **c, Tissue collection, multi-omics integrated analyses and gene regulatory networks (GRNs).** Samples from the pituitary gland, ovary and liver were collected at each sampling event. High-throughput sequencing was utilised to profile genome-wide changes in transcriptomes, DNA methylomes in the three tissues along with chromatin accessibility in liver. These genome-wide results were integrated with knowledge of key regulators (TFs) and other results from previous work that identified maturation associated-SNPs and tissue-specific genes. PCIT algorithm was then utilised to construct gene regulatory networks (GRNs). Pre- and post-maturation GRNs were constructed to identify differentially connected genes (DCGs).



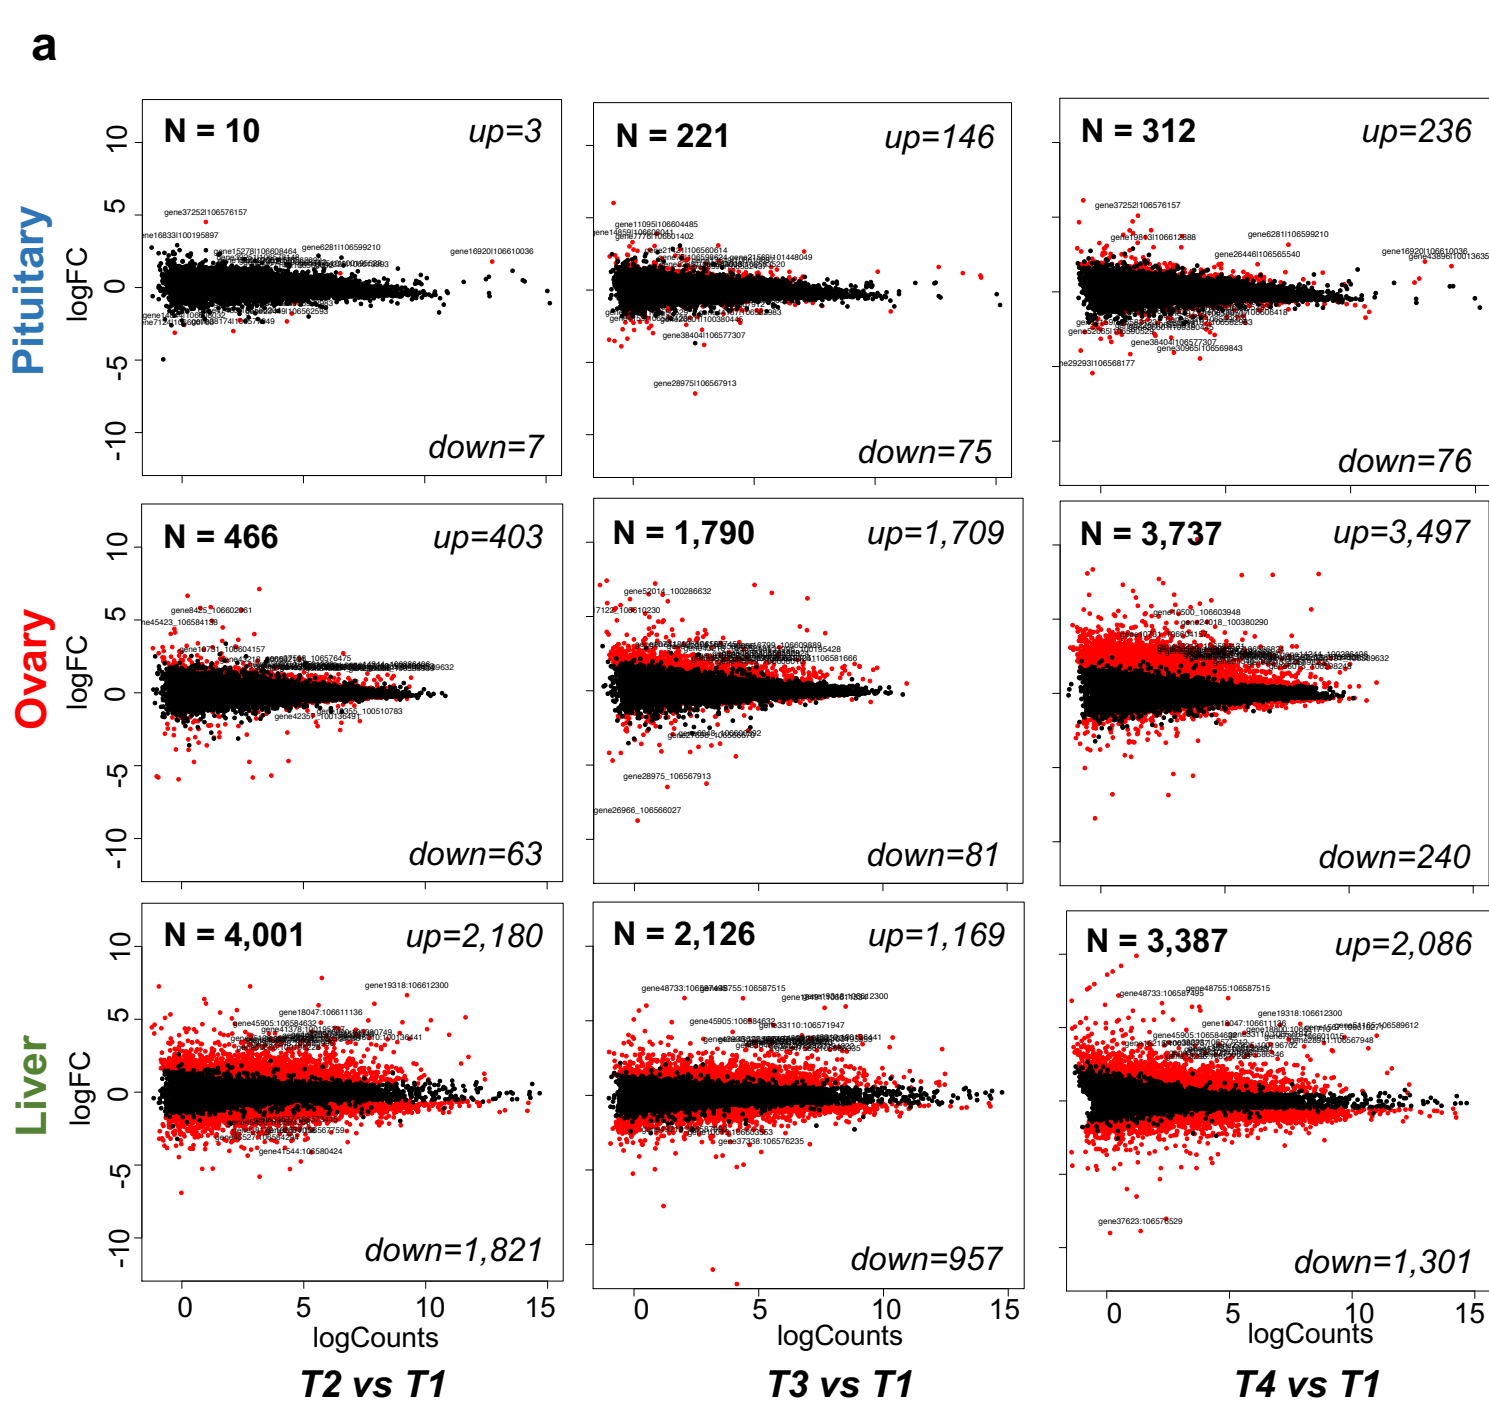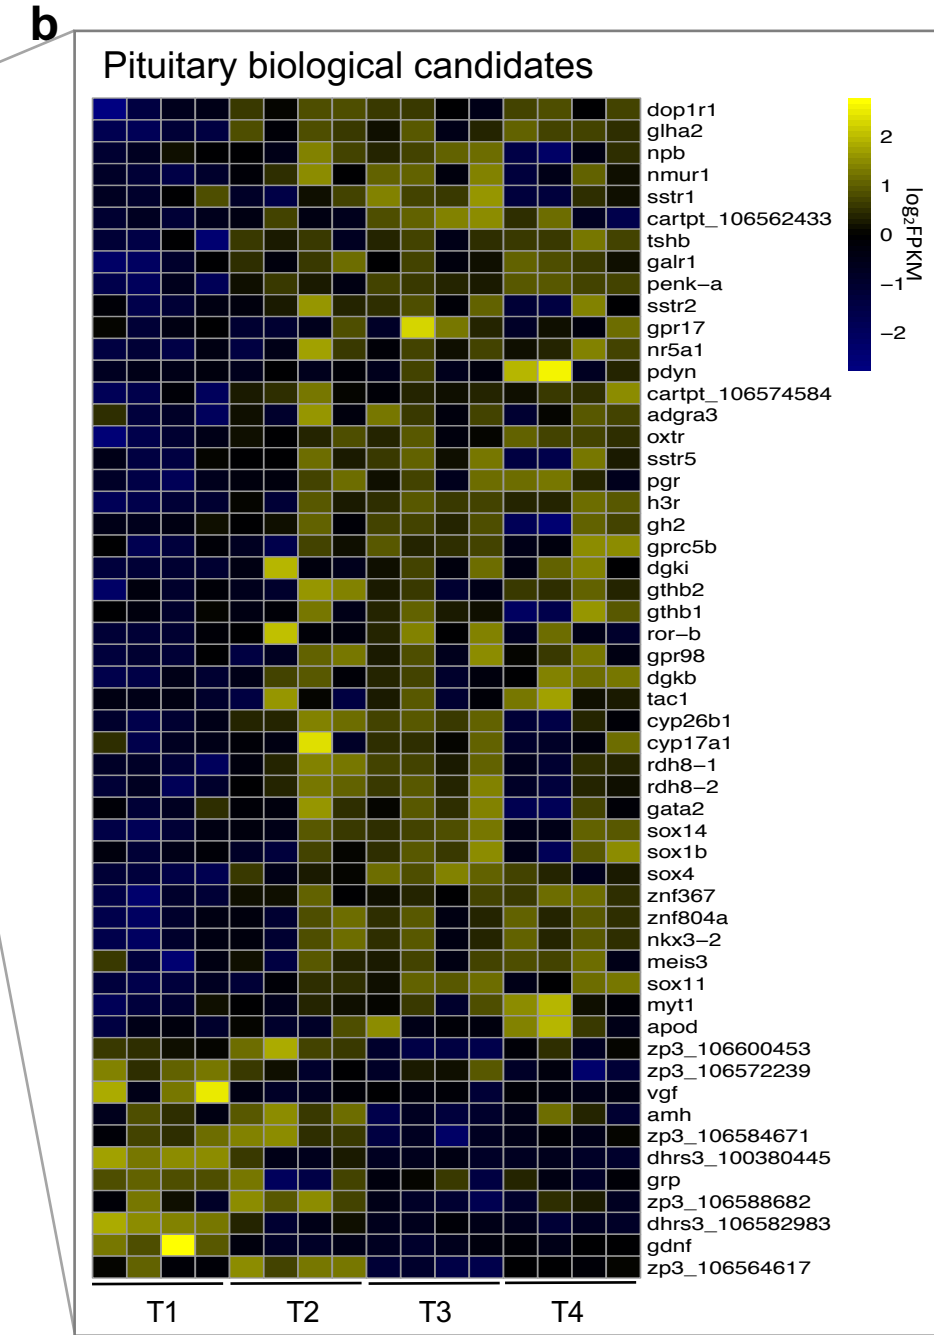

**Fig.2 Significant transcriptome remodelling driving onset of salmon**

**maturation. a**, 9 MA plots showing differentially expressed genes (DEGs) in pituitary, ovary and liver (FDR < 0.05 and log<sub>2</sub>fold change >± 1) at T2, T3 and T4 during maturation compared to control samples at T1. Transcriptomic results reveal gene upregulation in both pituitary gland and ovary during maturation. **b**, Heatmap of pituitary candidate genes with significant expression. The hierarchical clustering was obtained by comparing the log<sub>2</sub>-transformed and mean-centred FPKM values. Upregulated genes in the pituitary include several genes with reproduction-related functions such as steroidogenesis (*cyp17a1*), hormone receptors (*oxtr*, *pgr*, *dop1r1*, *galr1*), genes coding for pituitary hormones (*gh2*, *gthb1*, *gthb2*, *glha2*), retinoic acid (RA) signalling (*cyp26b1*, *rhd8-1/2*), sex-related TFs (several *sox* genes and *gata2*). The upregulation of gonadotropins subunits (*gthb1*, *gthb2* and *glha2*) is highly significant in the context of maturation onset. *gthb1* and *gthb2* encoding gonadotropin subunits beta-1 and 2 and *glha2* encoding glycoprotein hormones alpha chain that constitutes the salmon gonadotropins (*gth-1* and 2).

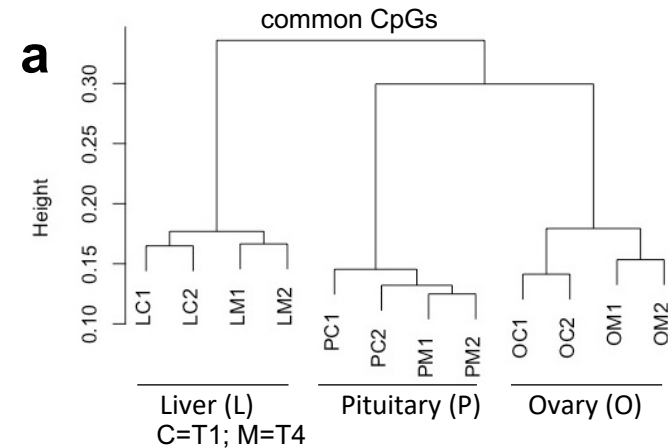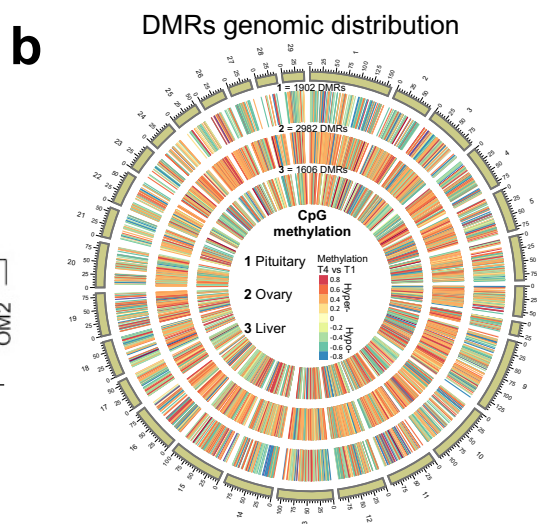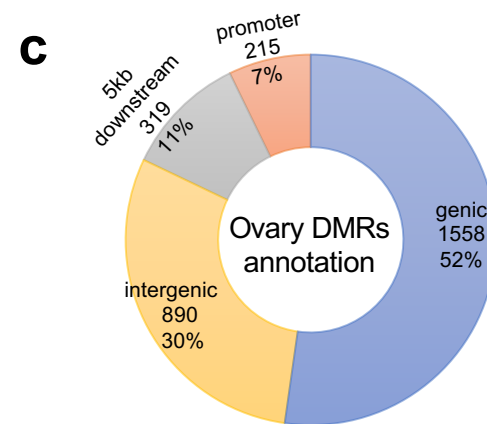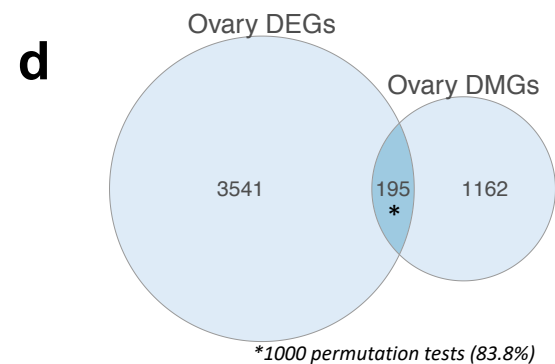

**e**

|      |                           | DEGs |            |
|------|---------------------------|------|------------|
|      |                           | Down | Up         |
| DMGs | total of 195 common genes |      |            |
|      | Hypomethylated            | 5    | 31         |
|      | Hypermethylated           | 11   | <b>148</b> |

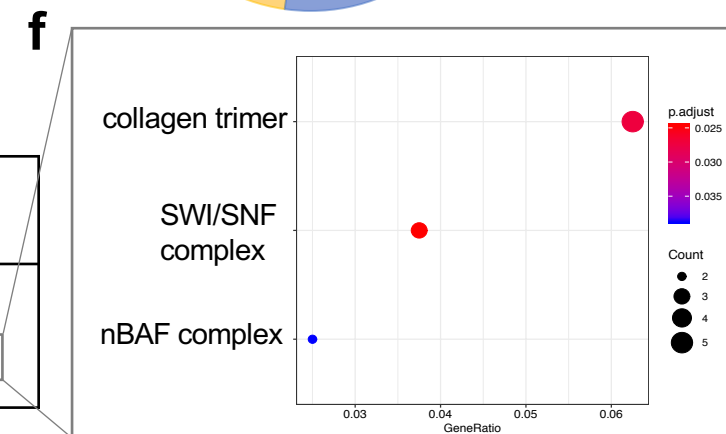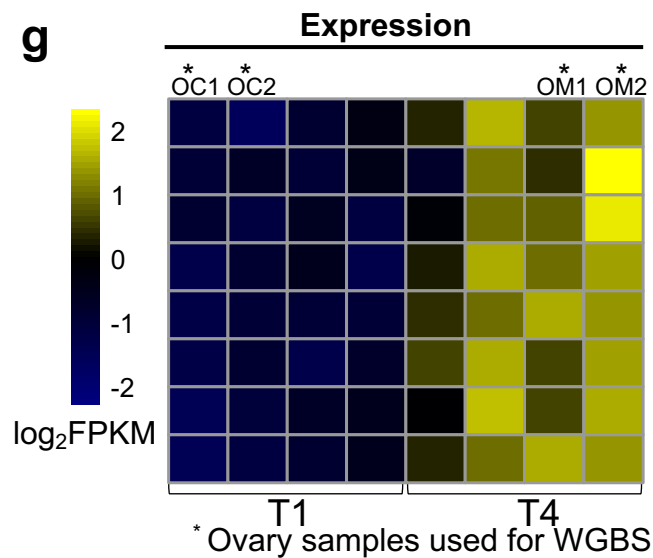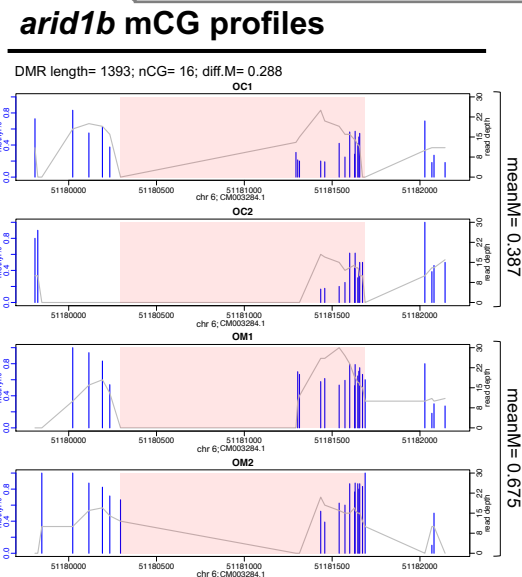

**Fig.3 Multi-tissue DNA methylome maps reveal methylated genes with key roles in salmon maturation.** **a**, Hierarchical clustering of the common CpGs in the 12 methylome libraries reveals clustering by tissue type and grouping pituitary and ovary in a cluster and liver in the other. This shows variation in methylation is much lower between replicates of the same sample compared with variation among tissues as expected for high quality data. **b**, Circos plot shows genome-wide distribution of the significant differentially methylated regions (DMRs) detected in T4 samples compared to the control T1 in pituitary, ovary and liver (from the outer circle inwards). **c**, Genomic distribution of ovary DMRs across gene models in the salmon genome shows the majority co-located within genes, promoter defined as genomic regions located 5kb upstream of transcription start sites (TSSs). **d**, Significant overlap between ovary DMGs and DEGs. **e**, DNA methylation and expression directionality at gene bodies confirms that gene body methylation positively affects gene expression. **f**, Enriched gene ontology (GO) terms (hypergeometric test, Bonferroni-adjusted  $P < 0.05$ ) among the list of 148 hypermethylated genes in ovary. **g**, Heatmaps showing significant upregulation of genes driving GO enrichment shown in part f, mean CpG methylation levels of upregulated genes before and after maturations and CpG methylation profiles for the *arid1b* gene. The methylation plot shows percentages of methylated CpGs along with coverage depth at each CpG site. Pink rectangles represent the differentially methylated regions. Genomic coordinates are indicated below the density plot and DMR details are also indicated.

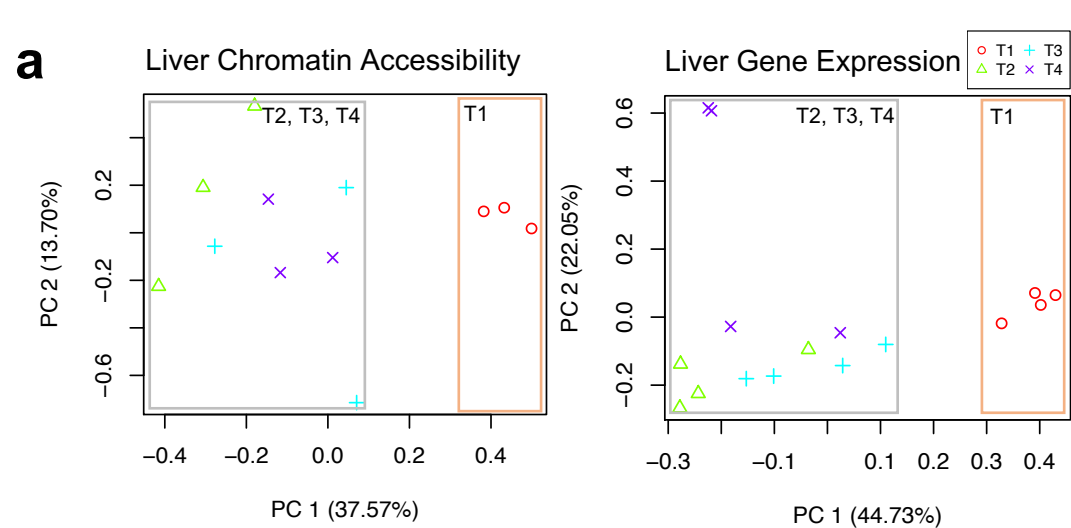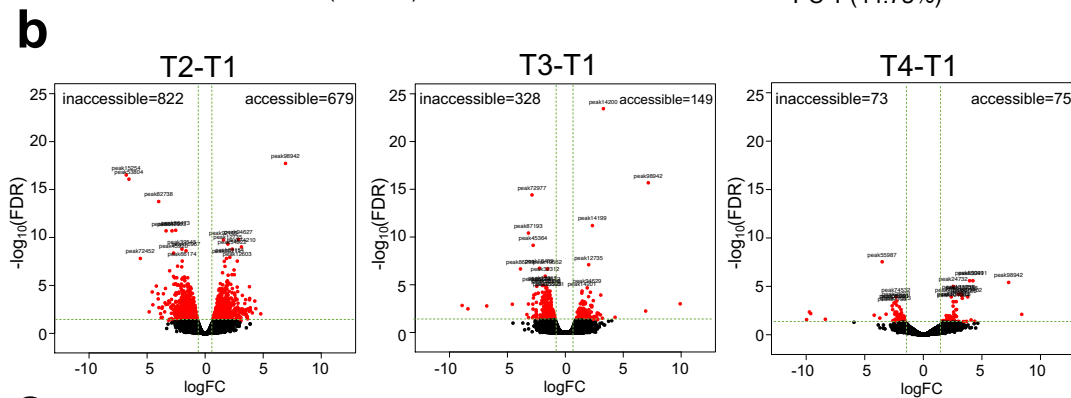

**c** Summary statistics for differential accessibility (DAC) at genes T2, T3, and T4. The table shows the number of differentially expressed genes (DEG) and the parameters b, b2, and R2 (%) for each comparison.

|        | DAC T2 |        |        | DAC T3 |        |        | DAC T4 |        |        |
|--------|--------|--------|--------|--------|--------|--------|--------|--------|--------|
|        | b      | b2     | R2 (%) | b      | b2     | R2 (%) | b      | b2     | R2 (%) |
| DEG T2 | 0.5123 | 0.291  | 36.8   | 0.6275 | 0.0711 | 20.8   | 0.6053 | 0.1044 | 29.5   |
| DEG T3 | 0.3985 | 0.2131 | 32.5   | 0.562  | 0.0335 | 24.8   | 0.4972 | 0.0432 | 27.5   |
| DEG T4 | 0.4311 | 0.2862 | 35.3   | 0.5548 | 0.0281 | 20.1   | 0.5617 | 0.1105 | 32.8   |

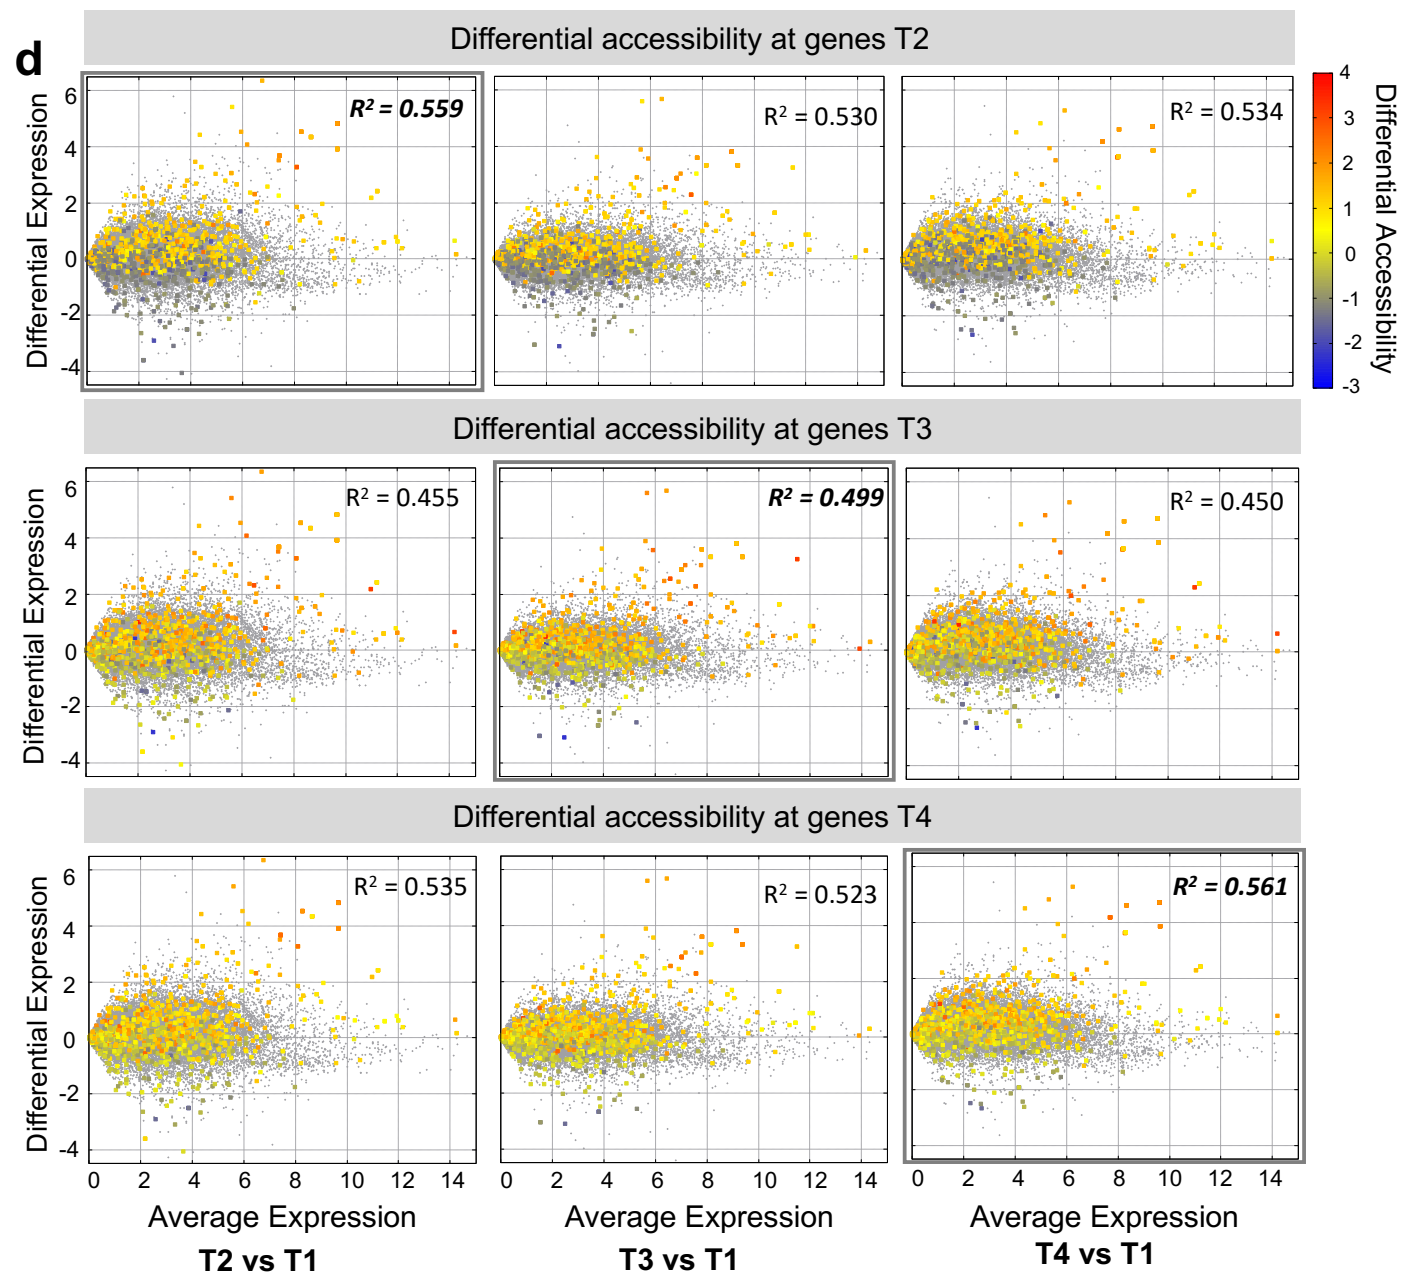

**Fig.4 Genome-wide maps of chromatin accessibility and gene expression changes. a, Combined ATAC-seq and RNA-seq analysis.** Principal component analysis (PCA) conducted using normalised ( $\log_2$ CPM) values of the lists of significant differentially accessible regions (DARs) and significant differentially expressed genes (DEGs) at T2, T3 and T4 during maturation compared to control samples at T1, the same significance thresholds were applied (FDR < 0.05 and  $\log_2$ fold change  $>\pm 1$ ). **b, Strong and early remodelling in the chromatin state landscape,** the volcano plots show differentially accessible regions (DARs) where mapping counts differed significantly between T1 and other time points. **c, Regression analysis conducted on significant DARs located at gene bodies and the corresponding gene expression data.** The table shows that accessibility at T2 explains the majority of the observed differential expression throughout the experiment. **d, Chromatin accessibility and gene expression are positively correlated.** 9 MA biplots showing genome-wide gene expression and overlain differentially accessible regions dynamics at gene bodies in liver at T2, T3 and T4 compared to T1. Chromatin accessibility levels are shown in red-blue spectrum reflecting open- to closed chromatin at gene bodies and the corresponding gene expression in grey colour. Note that  $R^2$  values are the highest when using gene expression and accessibility from the same time point.

**a**

accessible DARs (N=696;38%)

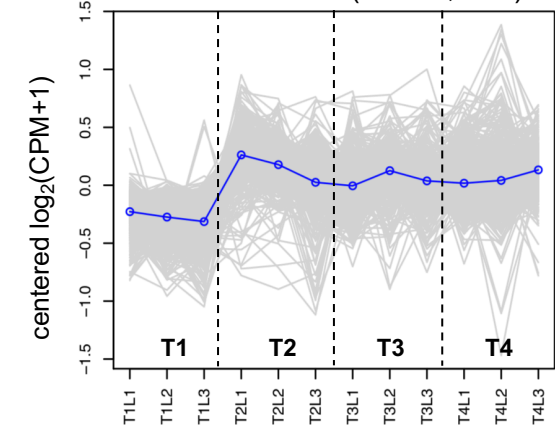

inaccessible DARs (N=1036;56.6%)

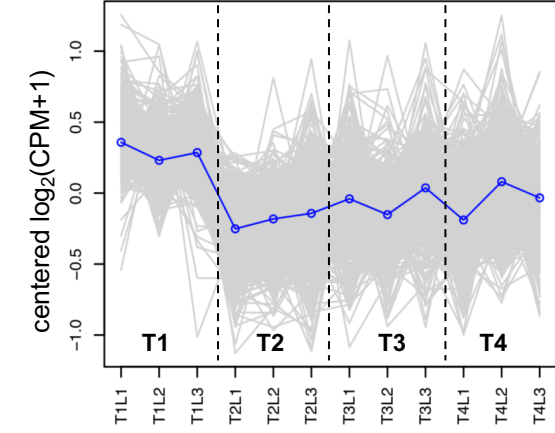

All other DARs (N=99;5.4%)

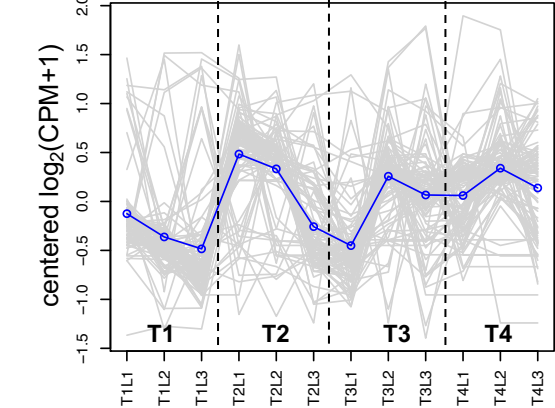**b**

A = accessibility; E = expression

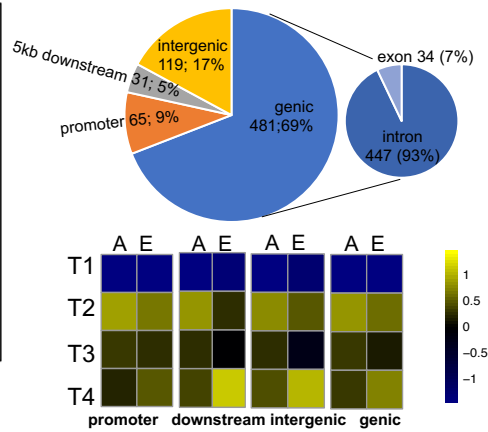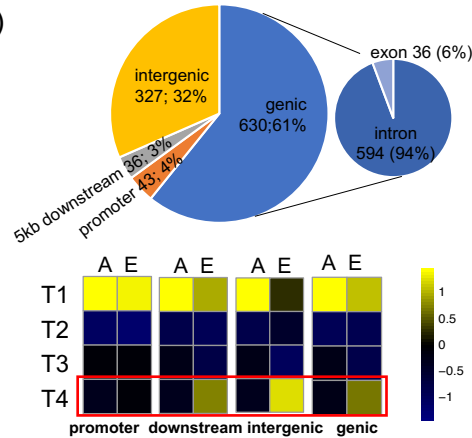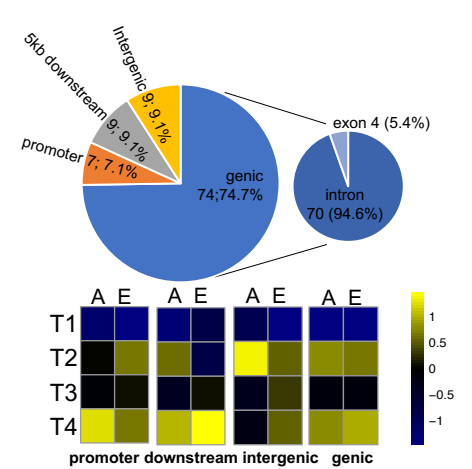**c**

Promoter Accessibility

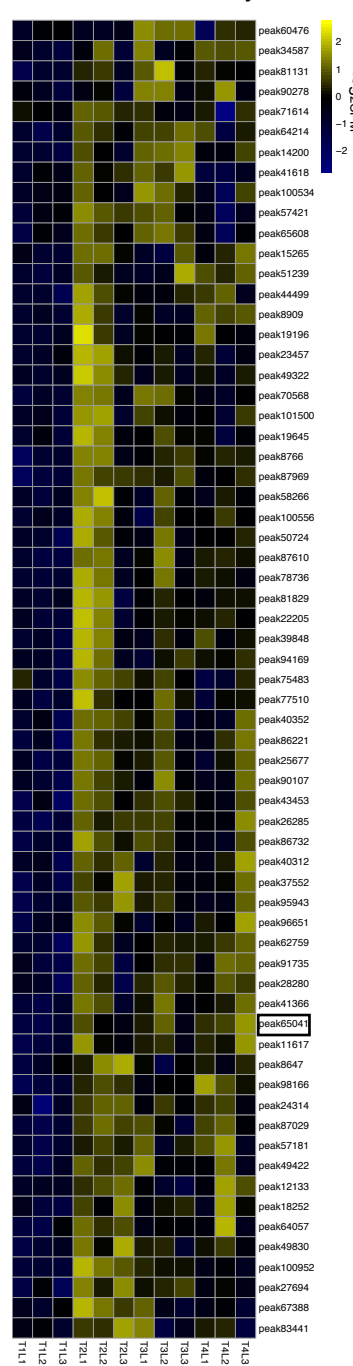

Expression of nearest genes

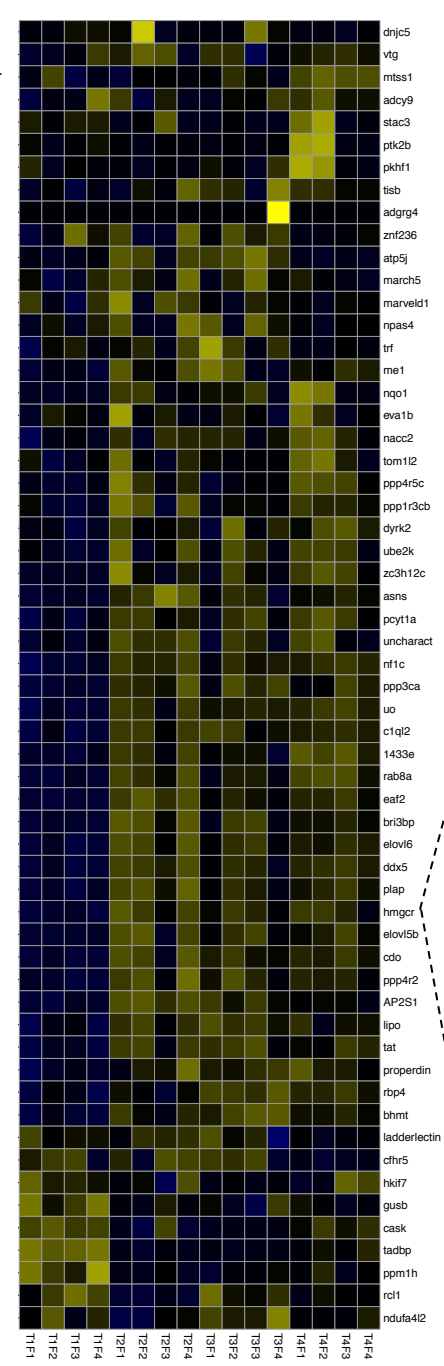**d**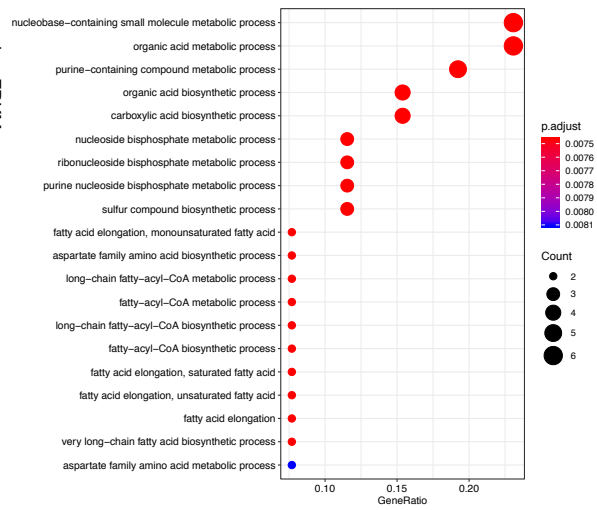**e**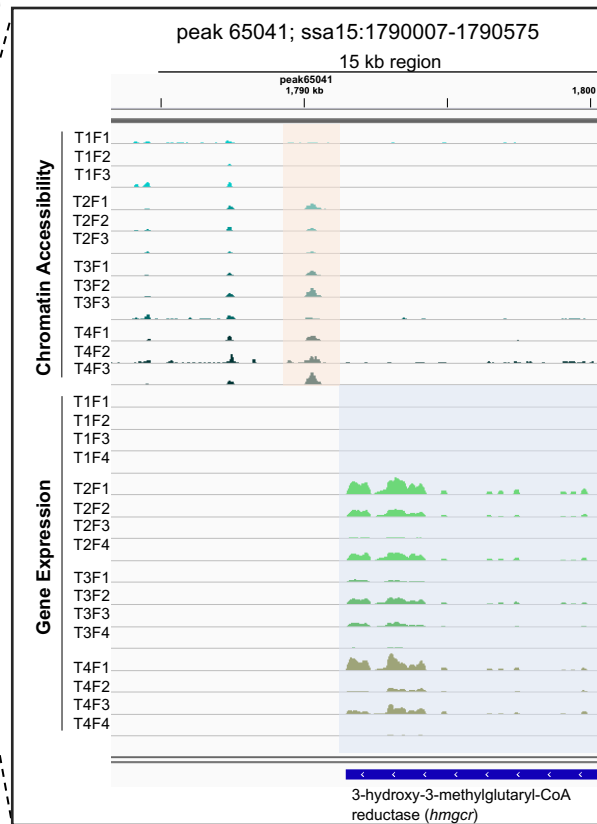

**Fig.5 Dynamics of chromatin accessibility and gene expression as a function of genomic location reveals strong association with putative cis-regulatory elements (CREs).** **a**, co-accessibility analysis reveals stable chromatin states following the onset of the maturation. The majority of DARs exhibited either reduced (n=1036 or 57%) or increased (n=696 or 38%) accessibility at T2 and remained unchanged at later timepoints. Less than 10% of DARs (n=99) displayed an oscillating pattern. The y-axis in each graph represents the mean-centered  $\log_2(\text{CPM}+1)$  value across time points on the x-axis. Accessibility of single DAR is plotted in grey, while the mean accessibility of each cluster is plotted in blue. **b**, Genomic distribution of DARs across gene models in the salmon genome, promoter defined as genomic regions located 5kb upstream of TSSs and multi-omic heatmaps showing mean accessibility and expression at each of the four time points per genomic location. **c**, Heatmaps 65 DARs located 5kb upstream of TSSs representing cis-regulatory elements (CREs) that exhibit increased accessibility at T2 along with gene expression of their target (nearest) genes. This showed upregulation of the majority of the associated genes in a tightly coordinated manner (n = 46; 79%’  $X^2 p < 8.028^{-08}$ ). **d**, Enriched gene ontology (GO) terms (hypergeometric test, Bonferroni-adjusted  $P < 0.05$ ) among the list of the CREs- regulated genes. This list includes genes involved in hepatic lipid metabolism (*hmgcr*) and energy metabolism (*elov15b* and *elov16*). **e**, IGV visualisation of a 15 kb region of Ssa15 spanning the CRE and exons of the *hmgcr* gene provides fine-scale view of the coordinated gene expression response to increased accessibility.



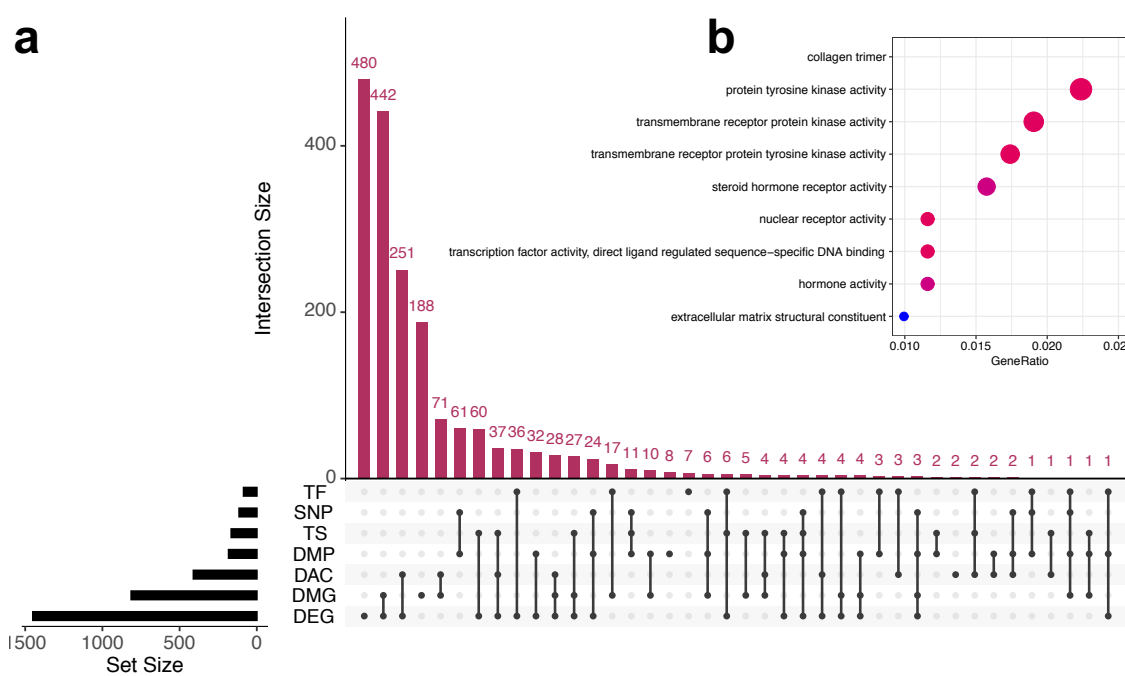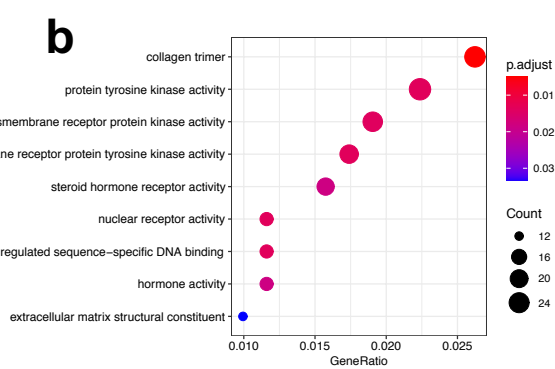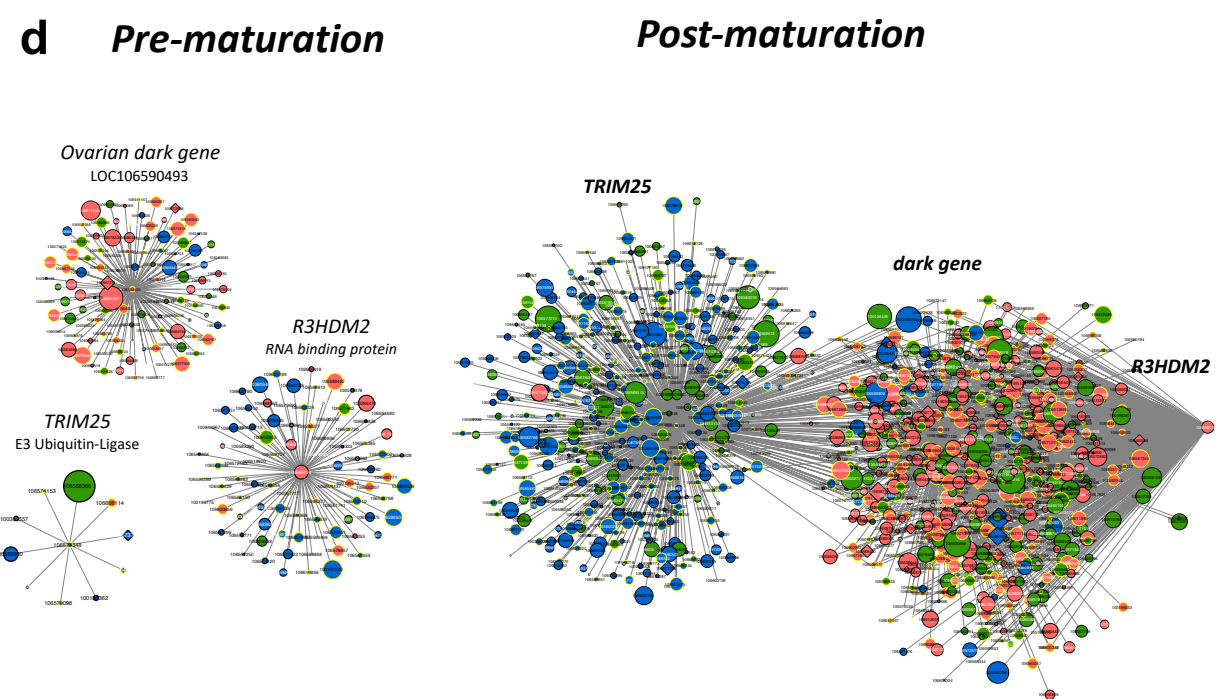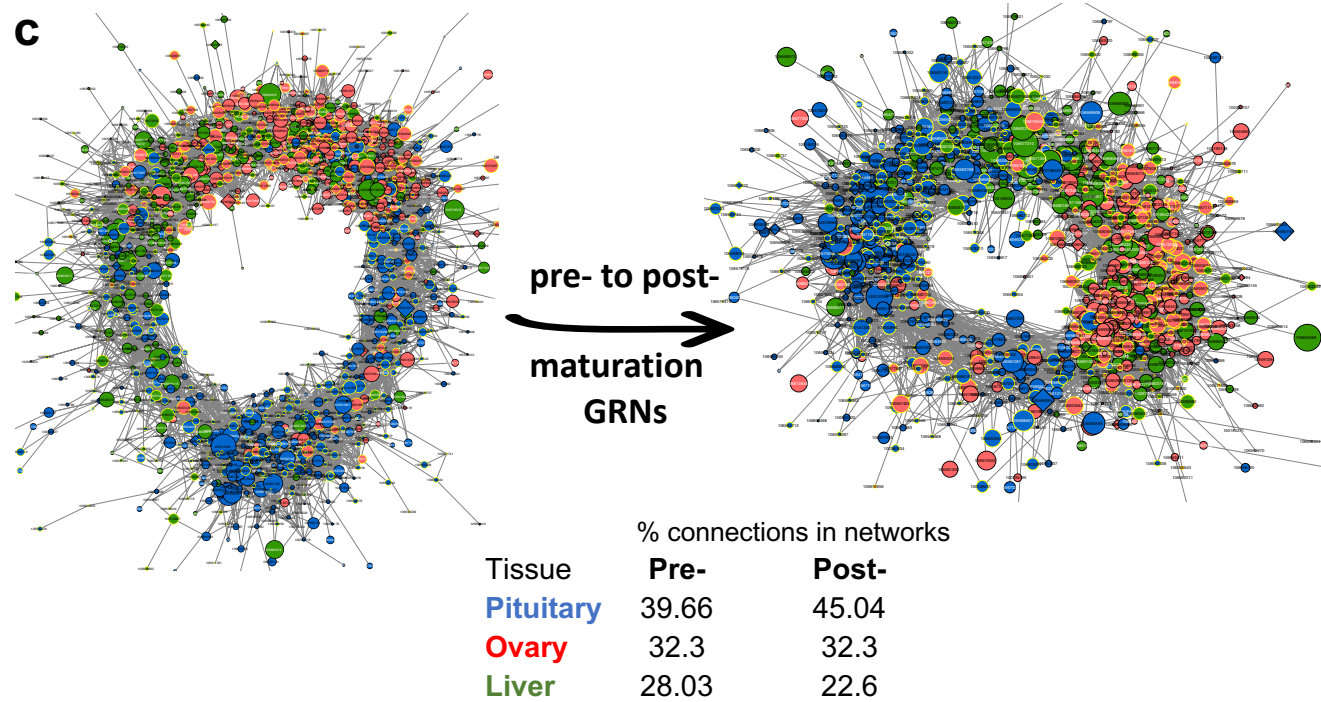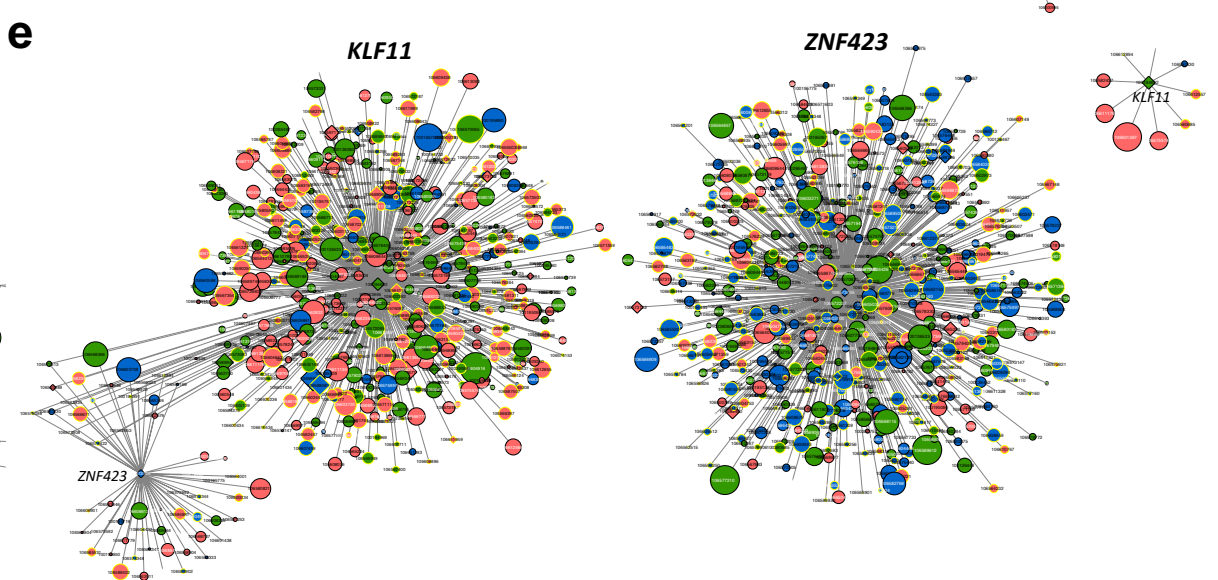

**Fig.6 Gene regulatory networks (GRNs) constructed via integrating multi-omics results. a, UpSet plot showing the intersection among the 1,858 genes selected for network analyses.** Genes were selected when represented at least once and have a mean normalised expression of at least 0.2 FPKM. Network genes were divided into 7 categories: differentially expressed genes (DEG), differentially expressed genes/promoters (DMG, DMP), differentially accessible regions (genic and promoter regions as DAC), genes harbouring SNPs reported in literature as being associated with salmon maturation (SNP), tissue-specific genes (TS) and key regulators identified by RIF (TF). The nature of a given intersection is indicated by the dots below the bar plot. For example, the 442 genes in the second column are both differentially methylated and differentially expressed but not found in other categories. **b, Enriched gene ontology (GO) terms** (hypergeometric test, Bonferroni-adjusted  $P < 0.05$ ) among the list of 1,858 network genes along with the gene ratio for the genes that map to each term. The majority of the enriched terms are related to hormone and receptor activities. **c, GRNs constructed using the PCIT algorithm for the pre- and post-maturation samples.** For visualisation purpose, only the most significant 10% of correlations their respective genes were considered. This shows increases in the connections in the pituitary that constituted 45% of the post-maturation network connections. All nodes are represented by ellipses except for genes coding key regulators (TFs) have diamond shape. Nodes with yellow borders are differentially methylated, whereas nodes with white labels are differentially accessible between pre- and post-maturation samples. Node colours are relative to the tissue of maximum expression with blue represents the pituitary, red represents ovary and green represents liver. The size of the nodes is relative to the normalized mean expression values in all samples. **d, Subnetworks of top differentially connected genes,** the networks created with the most trio genes differentially connected between pre- and post-maturation networks. This revealed TRIM25, a E3 Ubiquitin ligase as the key regulators with the greatest number of gained connections in the post-maturation network. TRIM25 was highly expressed in the pituitary and underwent changes in DNA methylation. **e, Subnetworks of top differentially connected TFs,** networks created with the most differentially connected TFs between pre- and post-maturation networks showed zinc finger protein 423 (ZNF423) as the key regulator with the greatest number of gained

connections and Kruppel-like factor 11 (KLF11) as the regulator with the least number of gained connections going from pre- to post-maturation.

| geneID    | Number of connections |       | differential connectivity<br>(Post vsPre) | annotation                                                                 | contribution | tissue of max expression | category     |
|-----------|-----------------------|-------|-------------------------------------------|----------------------------------------------------------------------------|--------------|--------------------------|--------------|
|           | Pre-                  | Post- |                                           |                                                                            |              |                          |              |
| 106574348 | 10                    | 599   | 589                                       | E3 ubiquitin/UBG15 ligase TRIM25-like                                      | 28.57        | pit                      | DE, DMG      |
| 106590493 | 114                   | 657   | 543                                       | uncharacterized protein LOC106590493, partial                              | 28.57        | ov                       | DE, DMG      |
| 106566126 | 90                    | 609   | 519                                       | R3H domain-containing protein 2-like                                       | 28.57        | ov                       | DE, DAC      |
| 106573705 | 58                    | 576   | 518                                       | zinc finger protein 423                                                    | 42.86        | pit                      | DE, TF, DAC  |
| 106589399 | 43                    | 551   | 508                                       | protocadherin-15-like                                                      | 14.29        | pit                      | DMG          |
| 106562515 | 4                     | 508   | 504                                       | RILP-like protein 1                                                        | 28.57        | liv                      | DE, DMG      |
| 106562229 | 30                    | 533   | 503                                       | tumor necrosis factor receptor type 1-associated DEATH domain protein-like | 28.57        | ov                       | DMG, DAC     |
| 106612386 | 41                    | 535   | 494                                       | zinc transporter protein DD8_G0282067                                      | 28.57        | ov                       | DE, DMG      |
| 106568904 | 37                    | 525   | 488                                       | putative ferric-chelate reductase 1                                        | 14.29        | ov                       | DE           |
| 106568722 | 10                    | 489   | 479                                       | cAMP-specific 3',5'-cyclic phosphodiesterase 4B-like                       | 14.29        | pit                      | DMG          |
| 106606431 | 487                   | 32    | -455                                      | metalloproteinase inhibitor 2-like                                         | 14.29        | pit                      | DE           |
| 100195217 | 543                   | 87    | -456                                      | protein phosphatase 1H                                                     | 28.57        | liv                      | DE, DAC      |
| 106613686 | 560                   | 104   | -456                                      | Krüppel-like factor 2                                                      | 28.57        | liv                      | DE, DAC      |
| 100195880 | 474                   | 11    | -463                                      | Ependymin-1 precursor                                                      | 14.29        | pit                      | DE           |
| 100195838 | 488                   | 18    | -470                                      | ependymin-2 precursor                                                      | 28.57        | ov                       | DE, DMP      |
| 106588682 | 594                   | 113   | -481                                      | zona pellucida sperm-binding protein 3-like                                | 14.29        | pit                      | DE           |
| 106610009 | 546                   | 46    | -500                                      | guanylate cyclase soluble subunit beta-1                                   | 28.57        | liv                      | DMP, DMG     |
| 100194692 | 513                   | 9     | -504                                      | Krüppel-like factor 11                                                     | 28.57        | liv                      | DE, TF       |
| 100196465 | 560                   | 31    | -529                                      | glyoxalase domain-containing protein 5                                     | 14.29        | ov                       | DE           |
| 106586502 | 559                   | 7     | -552                                      | serine/arginine repetitive matrix protein 2-like                           | 42.86        | ov                       | DE, DMG, DAC |
